# Supplementary material for: Amino acid-derived bisphenolate palladium complexes as C–C coupling catalysts
Source: Royal Society of Chemistry journal article supplement (doi:10.1039/d1dt03068j), 2021-01-01
Supplement: d1dt03068j1.pdf [file d1dt03068j1.pdf]

## Supplementary Information

# Amino acid-derived bisphenolate palladium complexes as C-C coupling catalysts

*Eszter Fazekas, David T. Jenkins, Andrew A. Forbes, Brendan Gallagher, Georgina M. Rosair, Ruairaidh D. McIntosh\**

Institute of Chemical Sciences, Heriot-Watt University, Edinburgh, EH14 4AS (UK)

### Contents

1.  $^1\text{H}$  and  $^{13}\text{C}$  NMR spectra of pro-ligands L1-L6
2. ESI High Resolution Mass Spectrometry data of pro-ligands L1-L6
3. X-ray structures of pro-ligands L1-L6
4. Data for the racemisation studies of pro-ligands L2, L3, L5 and L6
5.  $^1\text{H}$  and  $^{13}\text{C}$  NMR spectra of Pd complexes C1-C7
6. ESI High Resolution Mass Spectrometry data of Pd complexes C1-C7
7. Typical  $^1\text{H}$  NMR spectra of Suzuki-Miyaura and Mizoroki-Heck crude reaction mixtures
8. Crystallographic data and refinement details for ligands L1-L6 and complexes C1-C6
9. References

# 1. $^1\text{H}$ and $^{13}\text{C}$ NMR spectra of pro-ligands L1-L6

## L1

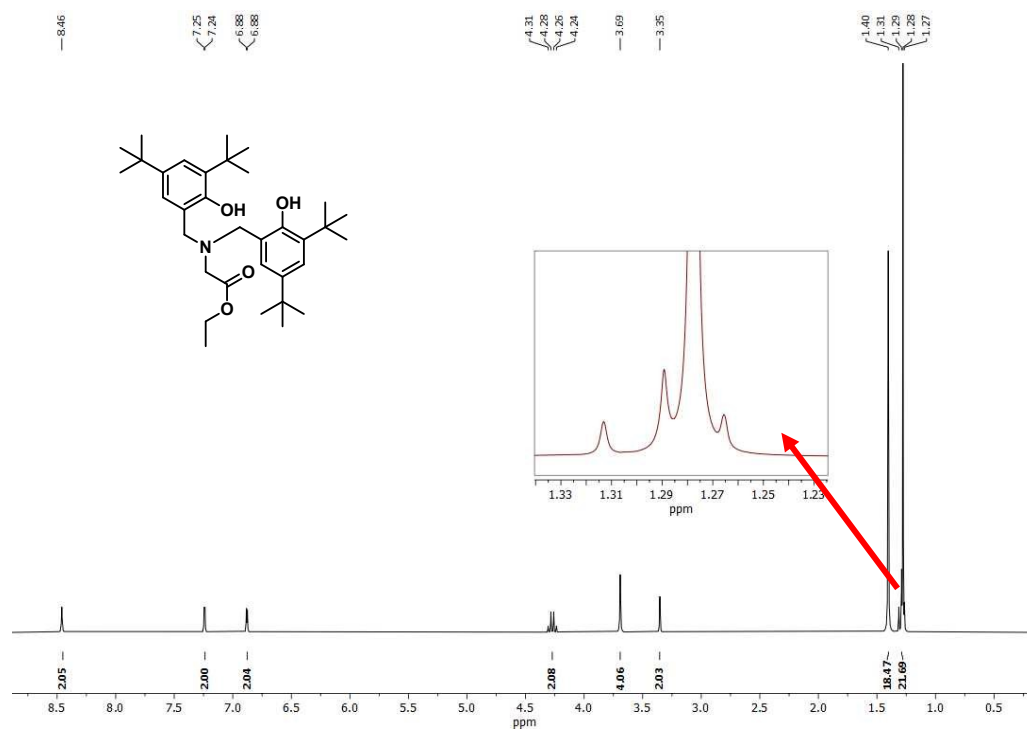

Figure S1.  $^1\text{H}$  NMR spectrum of L1 (300 MHz,  $\text{CDCl}_3$  at 298 K).

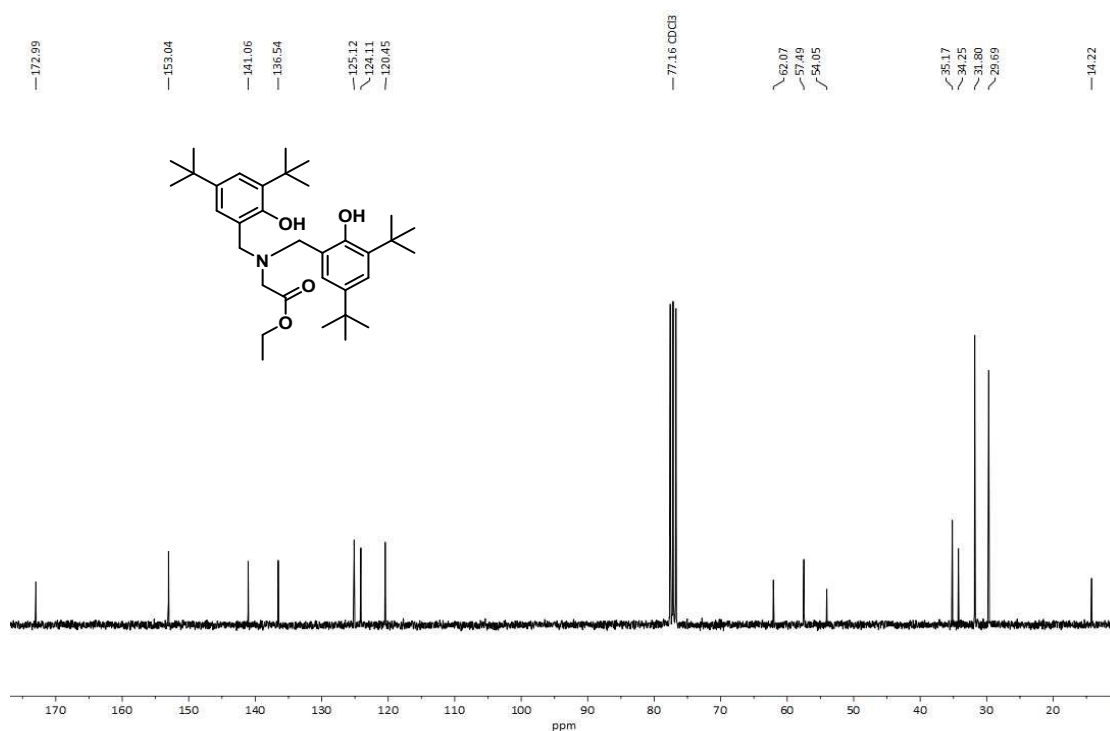

Figure S2.  $^{13}\text{C}$  NMR spectrum of L1 (75 MHz,  $\text{CDCl}_3$  at 298 K).

L2

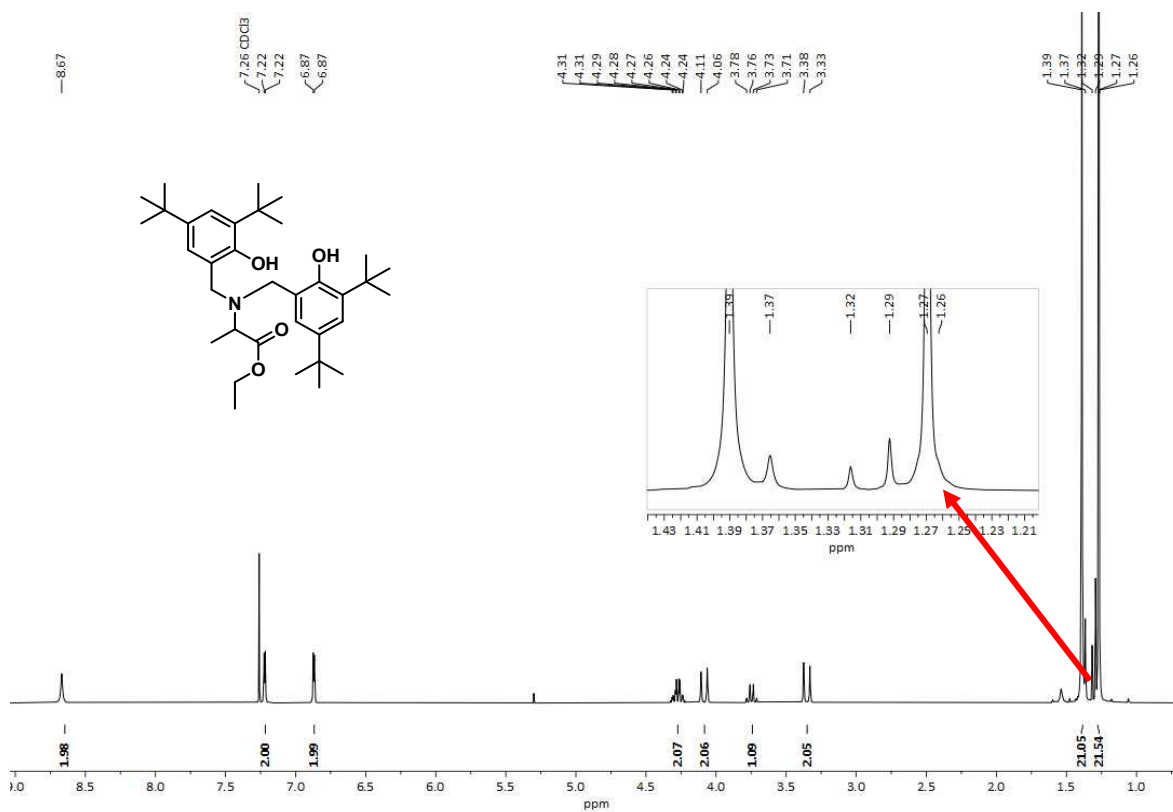

Figure S3. <sup>1</sup>H NMR spectrum of L2 (300 MHz, CDCl<sub>3</sub> at 298 K).

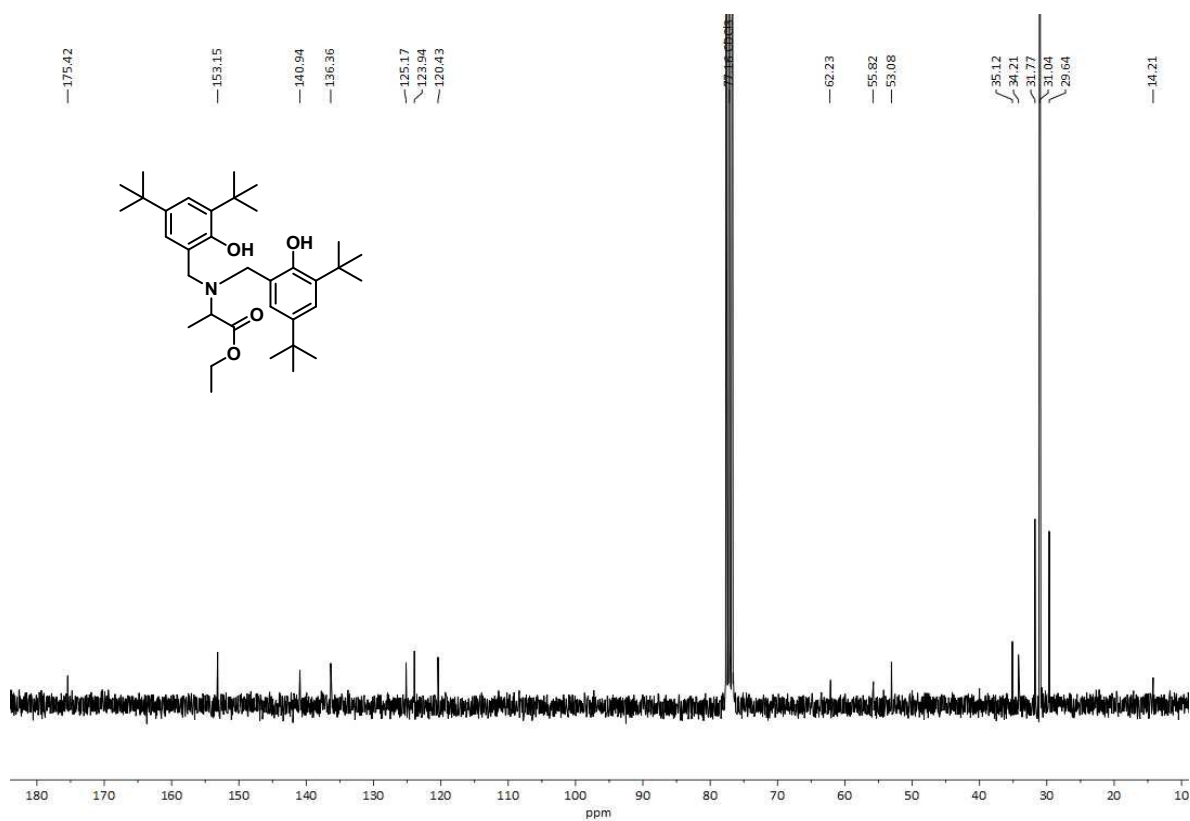

Figure S4. <sup>13</sup>C NMR spectrum of L2 (75 MHz, CDCl<sub>3</sub> at 298 K).

L3

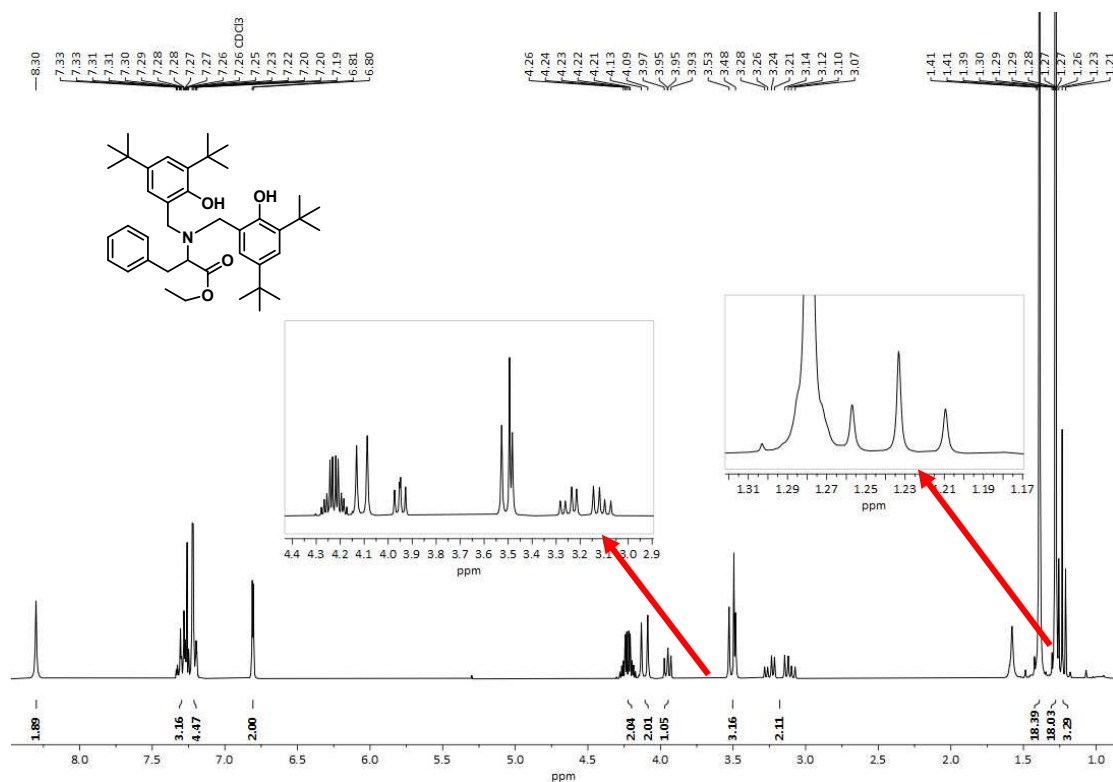

Figure S5. <sup>1</sup>H NMR spectrum of L3 (300 MHz, CDCl<sub>3</sub> at 298 K).

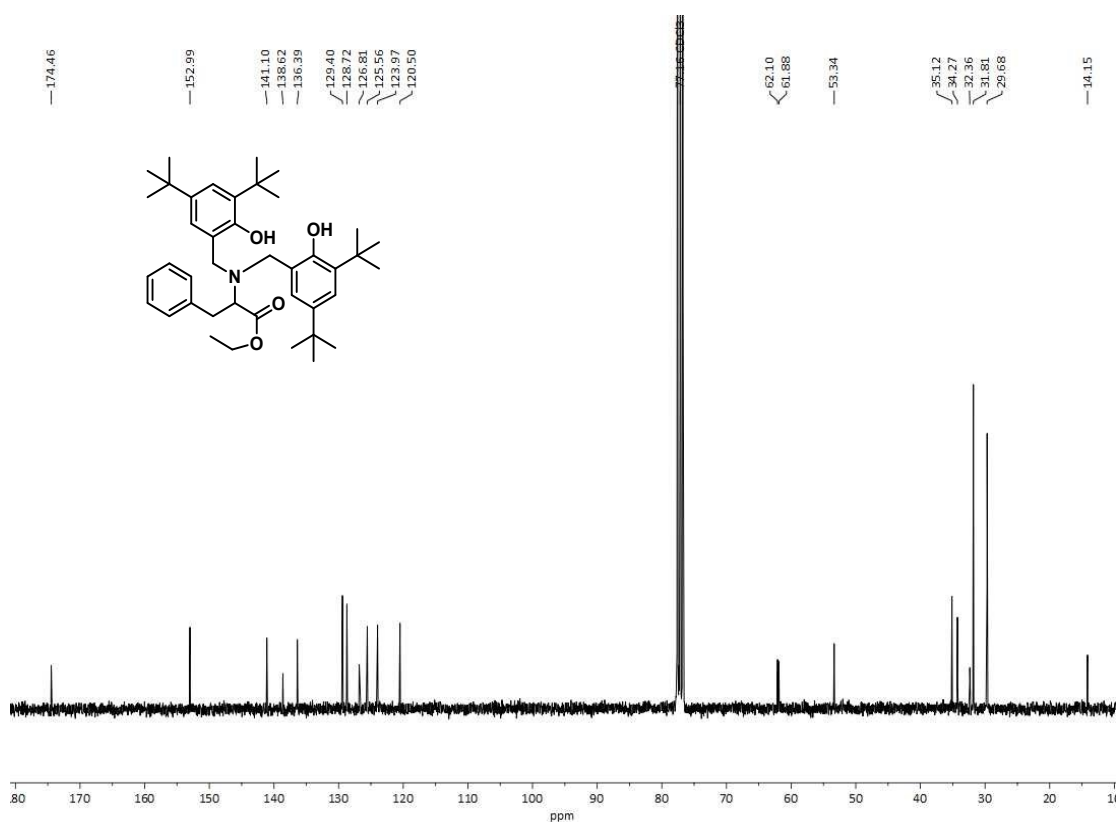

Figure S6. <sup>13</sup>C NMR spectrum of L3 (75 MHz, CDCl<sub>3</sub> at 298 K).

L4

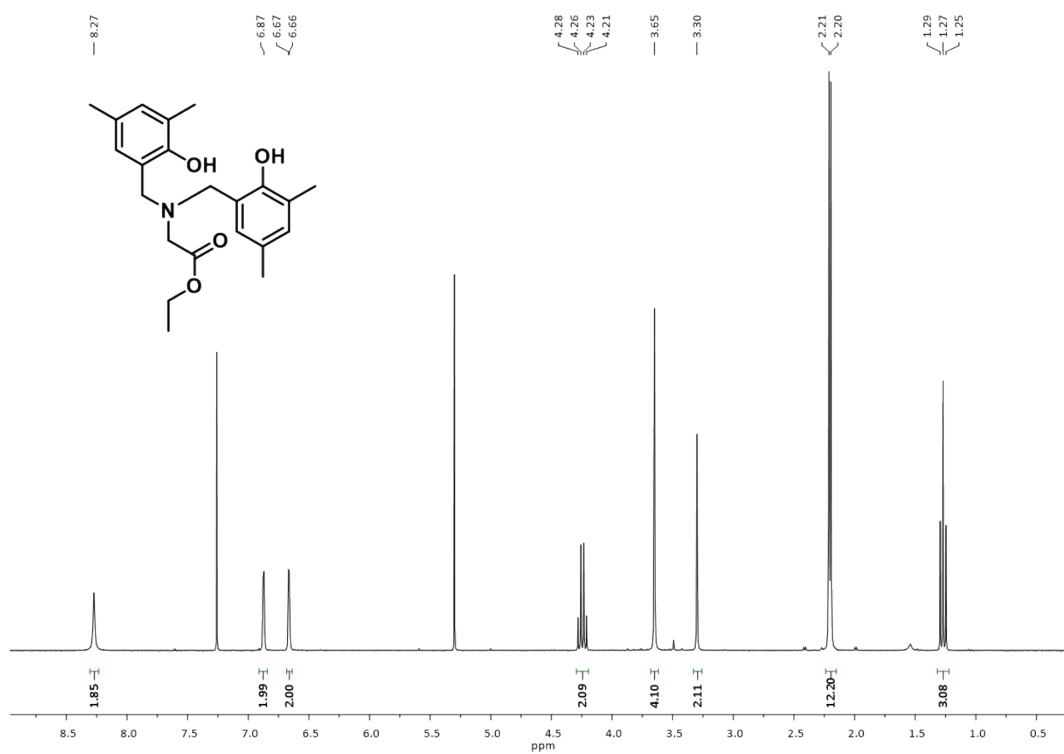

Figure S7. <sup>1</sup>H NMR spectrum of L4 (300 MHz, CDCl<sub>3</sub> at 298 K).

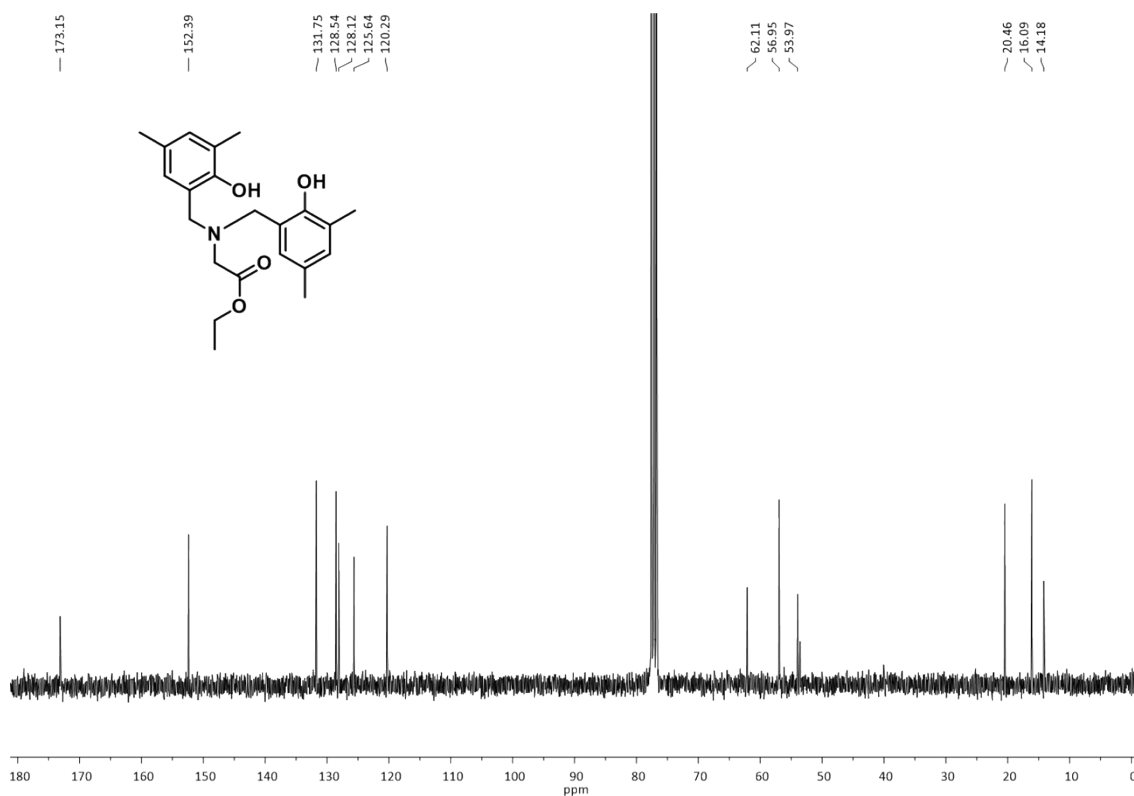

Figure S8. <sup>13</sup>C NMR spectrum of L4 (75 MHz, CDCl<sub>3</sub> at 298 K).

L5

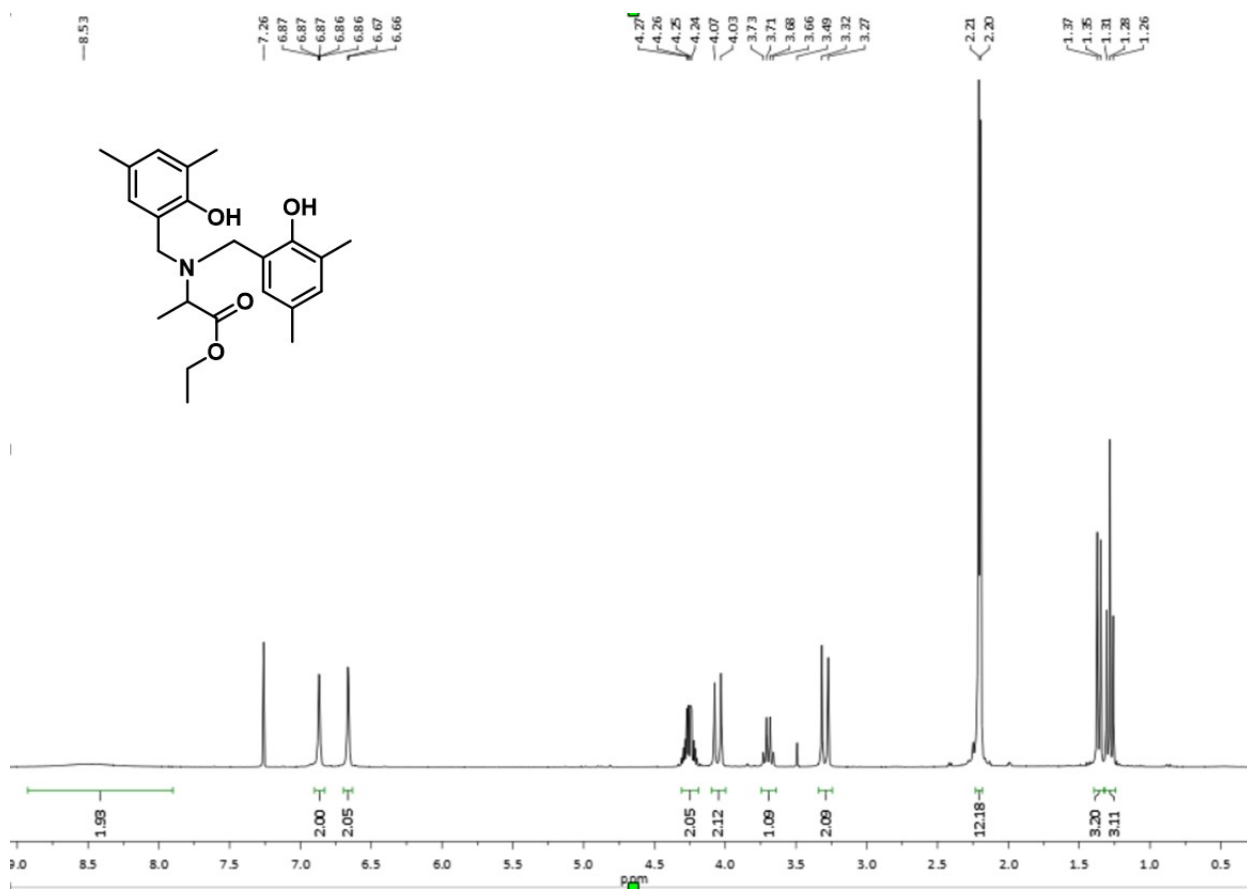

Figure S9. <sup>1</sup>H NMR spectrum of L5 (300 MHz, CDCl<sub>3</sub> at 298 K).

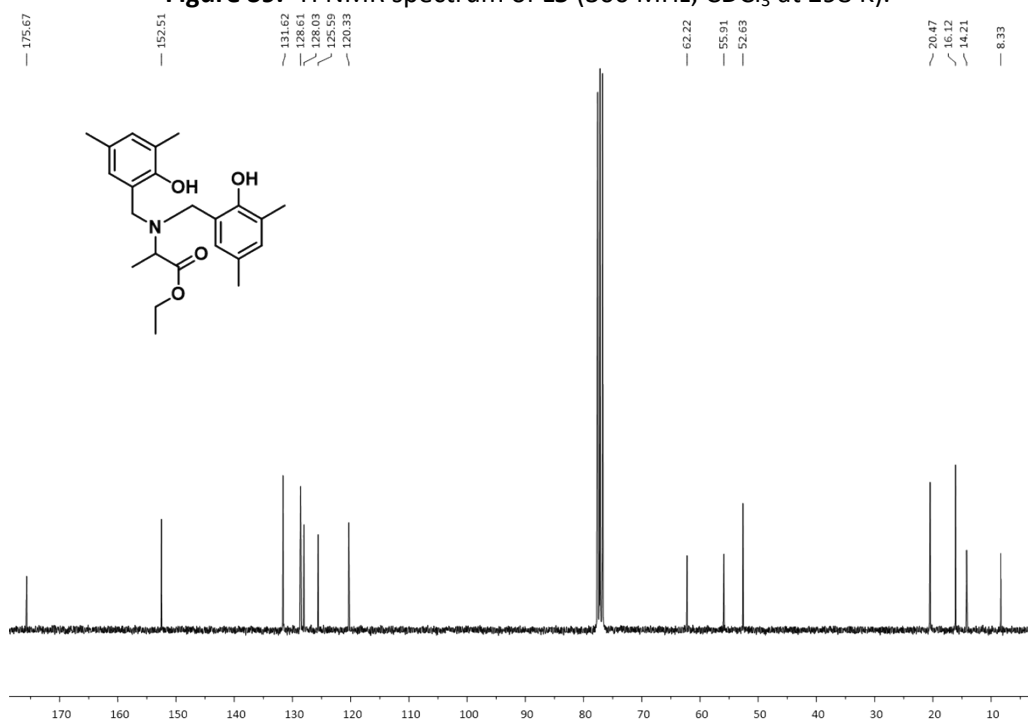

Figure S10. <sup>13</sup>C NMR spectrum of L5 (75 MHz, CDCl<sub>3</sub> at 298 K).

L6

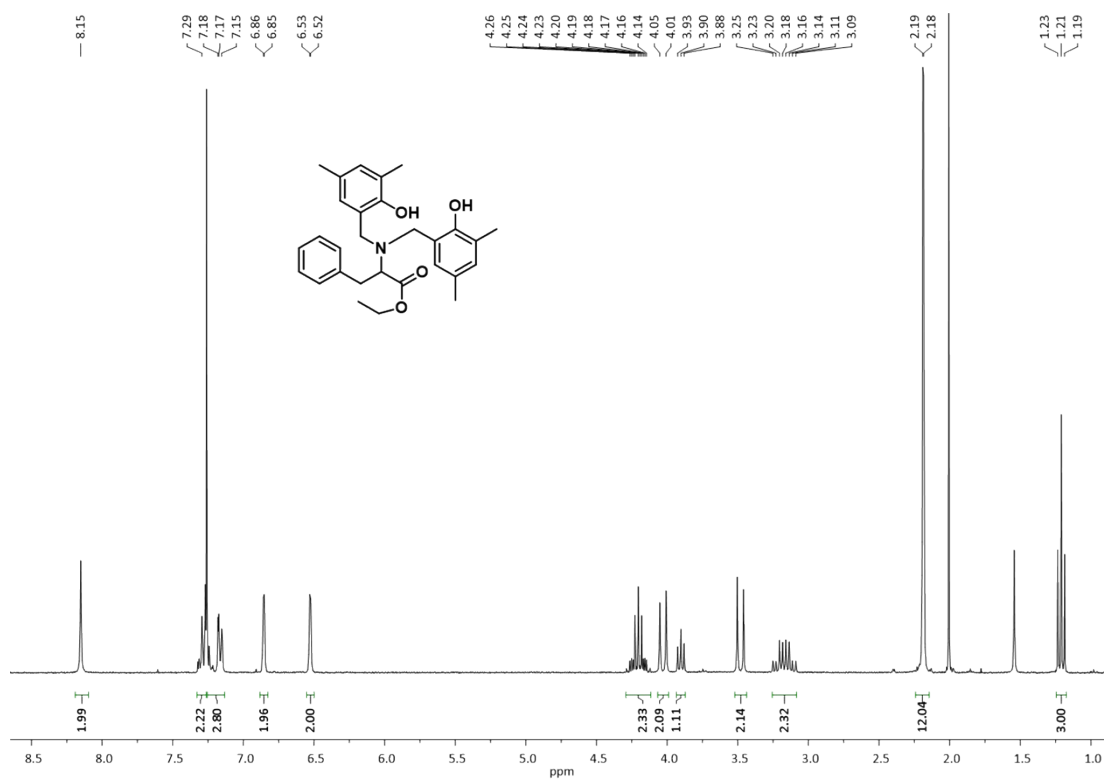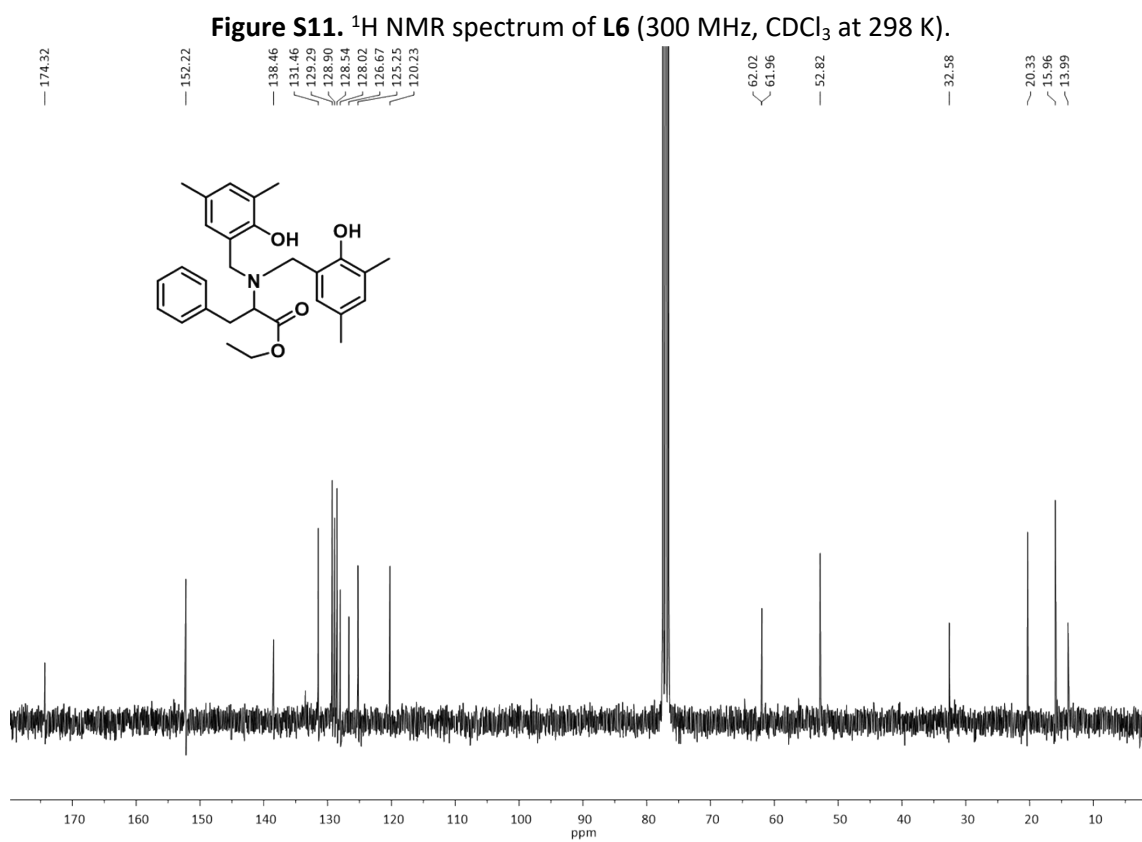

## 2. ESI High Resolution Mass Spectrometry data of pro-ligands L1-L6

L1

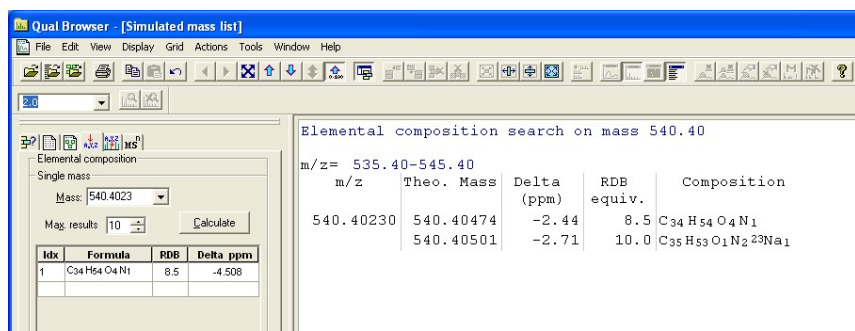

Figure S13. HRMS data of L1.

L2

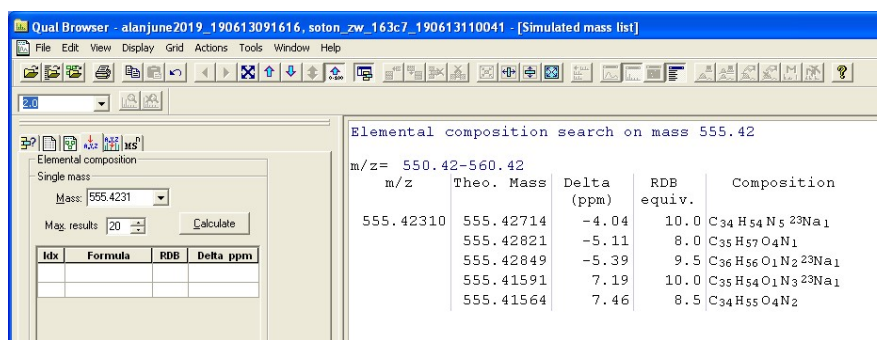

Figure S14. HRMS data of L2.

L3

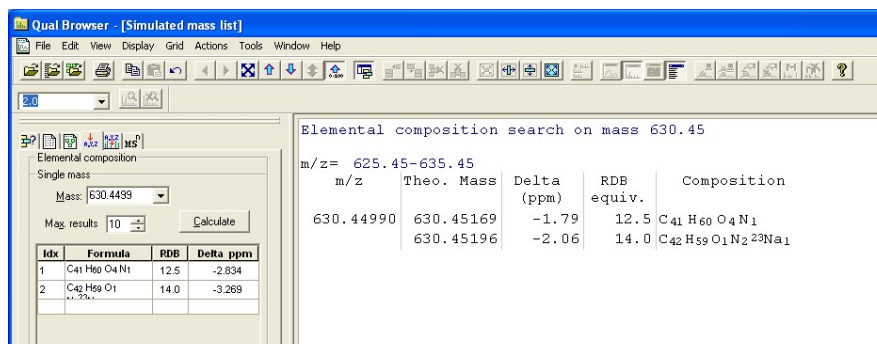

Figure S15. HRMS data of L3.

L4

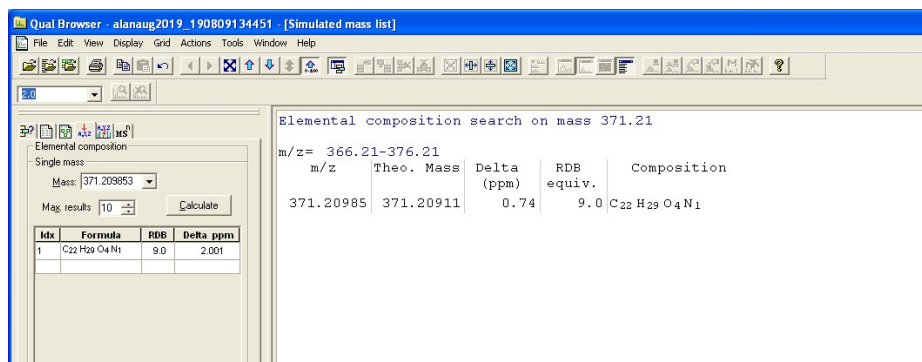

Figure S16. HRMS data of L4



L5

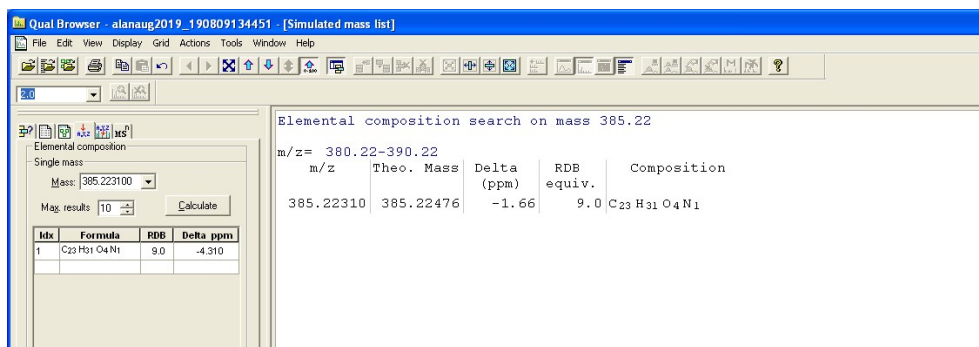

Figure S17. HRMS data of L5.

L6

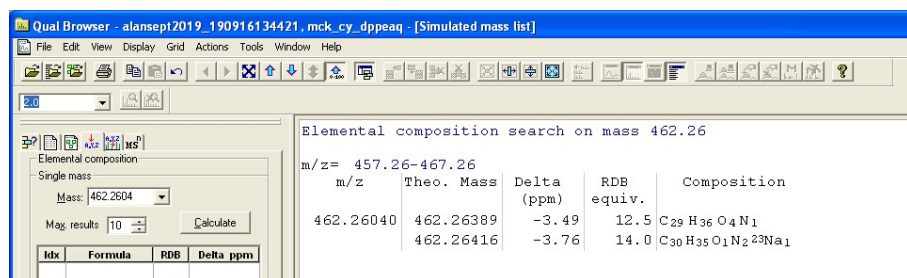

Figure S18. HRMS data of L6.

### 3. X-ray structures of pro-ligands L1-L6

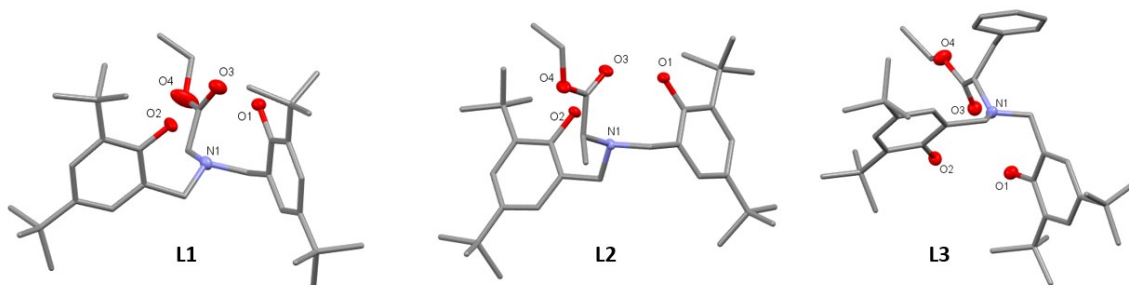

Figure S19. X-ray structures of L1, L2 and L3 (from left to right).

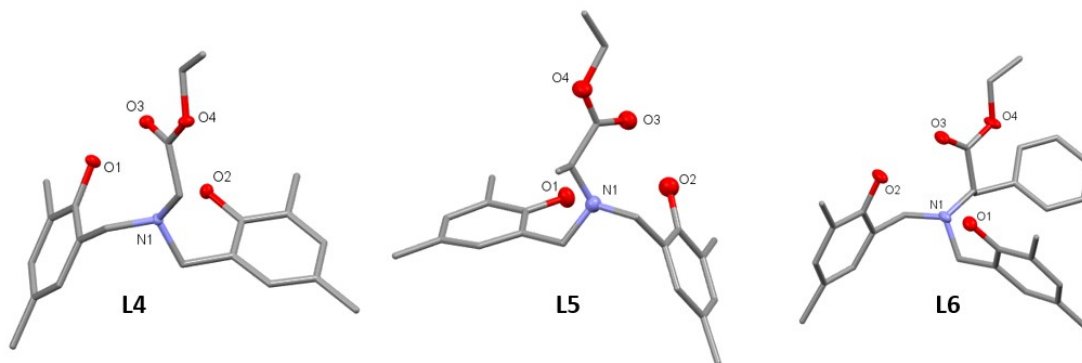

Figure S20. X-ray structures of L4, L5 and L6 (from left to right).

#### 4. Data for the racemisation studies of chiral pro-ligands

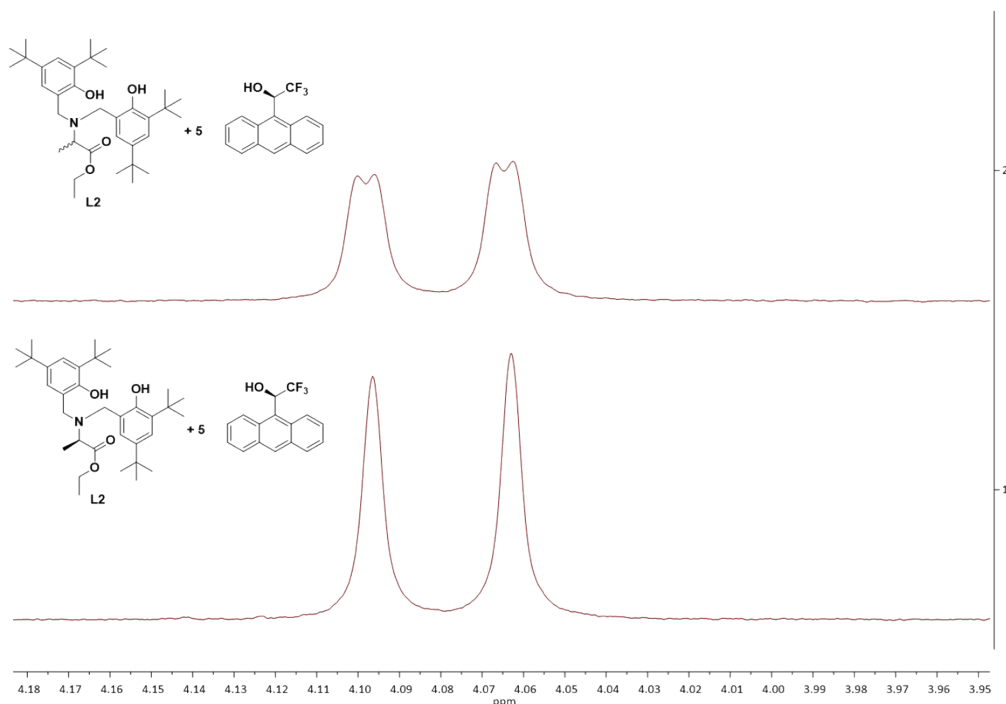

**Figure S21.** Comparison of the methylene resonances (4.08 ppm) in the  $^1\text{H}$  NMR spectra of racemic (top) and enantiopure (bottom) pro-ligand **L2** in the presence of 5 equivalents of (*R*)-(-)-1-(9-anthryl)-2,2,2-trifluoroethanol shift reagent (300 MHz,  $\text{CDCl}_3$  at 298 K).

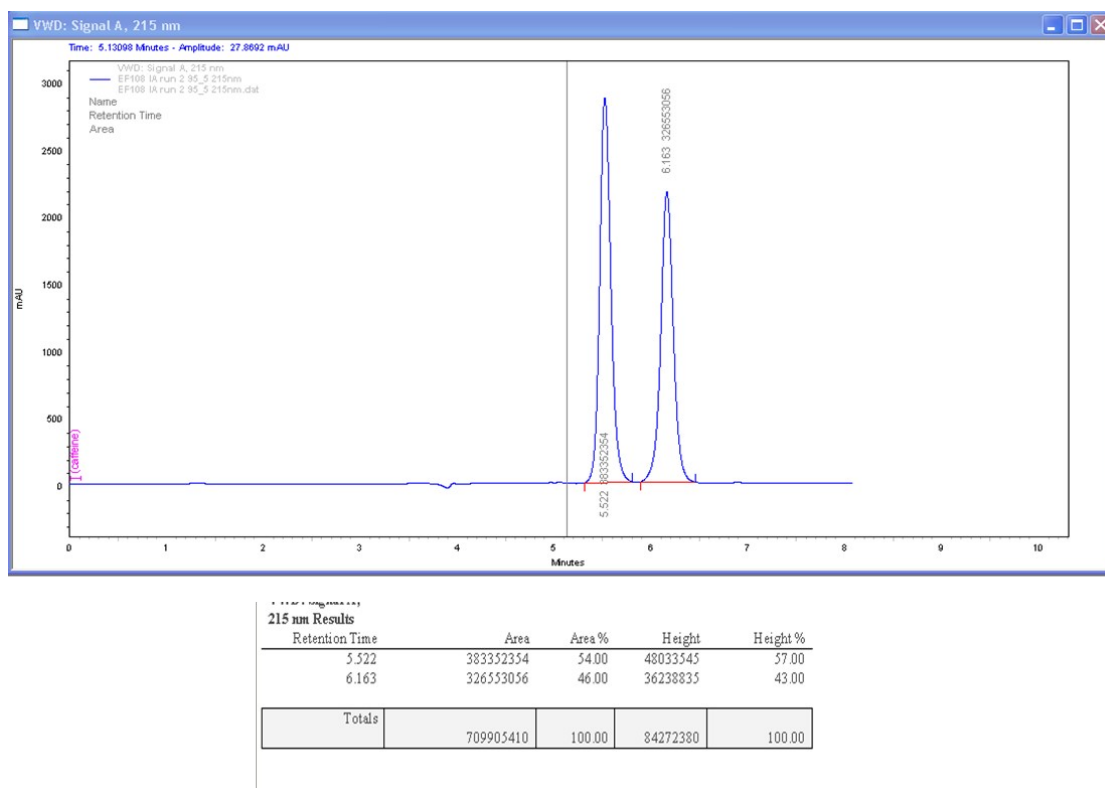

**Figure S22.** HPLC chromatogram of racemic pro-ligand **L5** on CHIRALPAK IA column, hexane:2-propanol 95:5, flow rate:  $1.0 \text{ mL min}^{-1}$ , detection UV 215 nm, 298 K)  $t_R$  of isomers: 5.52 min and 6.16 min.

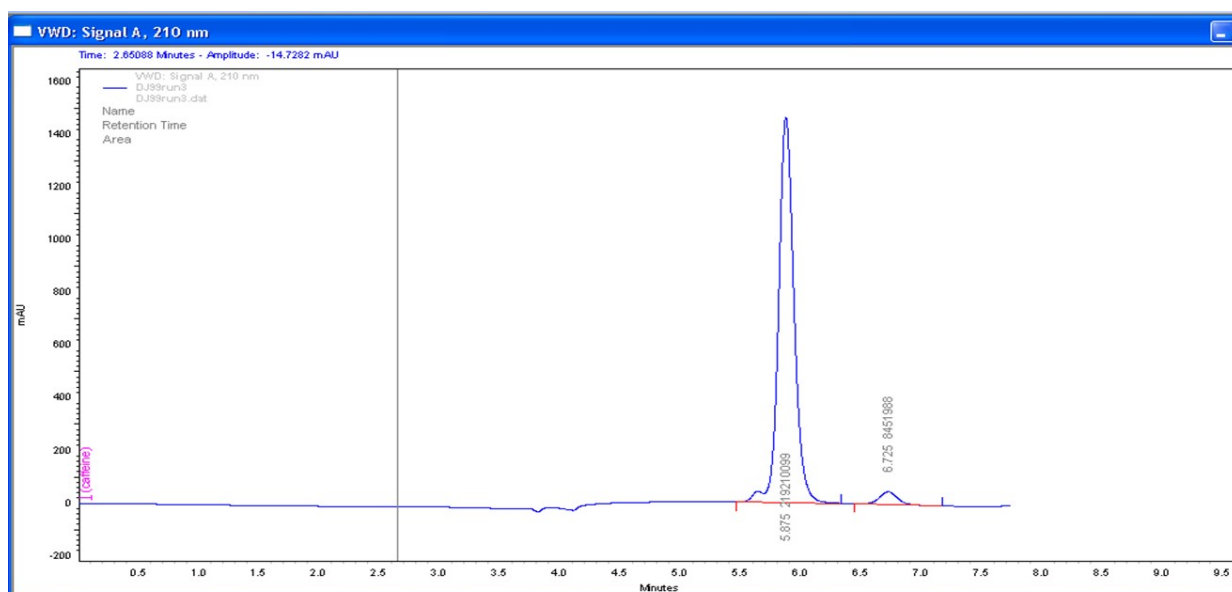

YWD: Signal A,  
210 nm Results

| Retention Time | Area      | Area % | Height   | Height % |
|----------------|-----------|--------|----------|----------|
| 5.875          | 219210099 | 96.29  | 24579618 | 96.78    |
| 6.725          | 8451988   | 3.71   | 818091   | 3.22     |
| Totals         | 227662087 | 100.00 | 25397709 | 100.00   |

**Figure S23.** HPLC chromatogram of (L)-L5 on CHIRALPAK IA column, hexane:2-propanol 95:5, flow rate: 1.0 mL min<sup>-1</sup>, detection UV 215 nm, 298 K) t<sub>R</sub> of major isomer: 5.87 min, t<sub>R</sub> of minor isomer: 6.72 min.

## 5. $^1\text{H}$ and $^{13}\text{C}$ NMR spectra of Pd complexes C1-C7

### C1

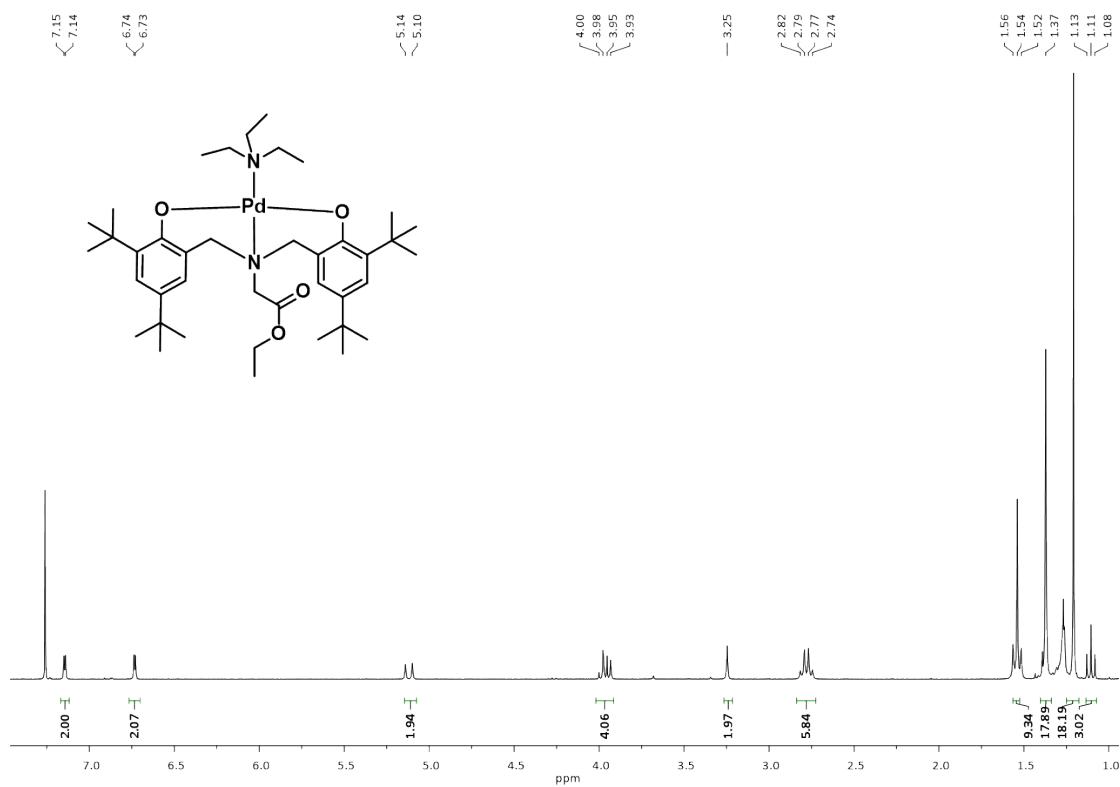

Figure S24.  $^1\text{H}$  NMR spectrum of C1 (300 MHz,  $\text{CDCl}_3$  at 298 K).

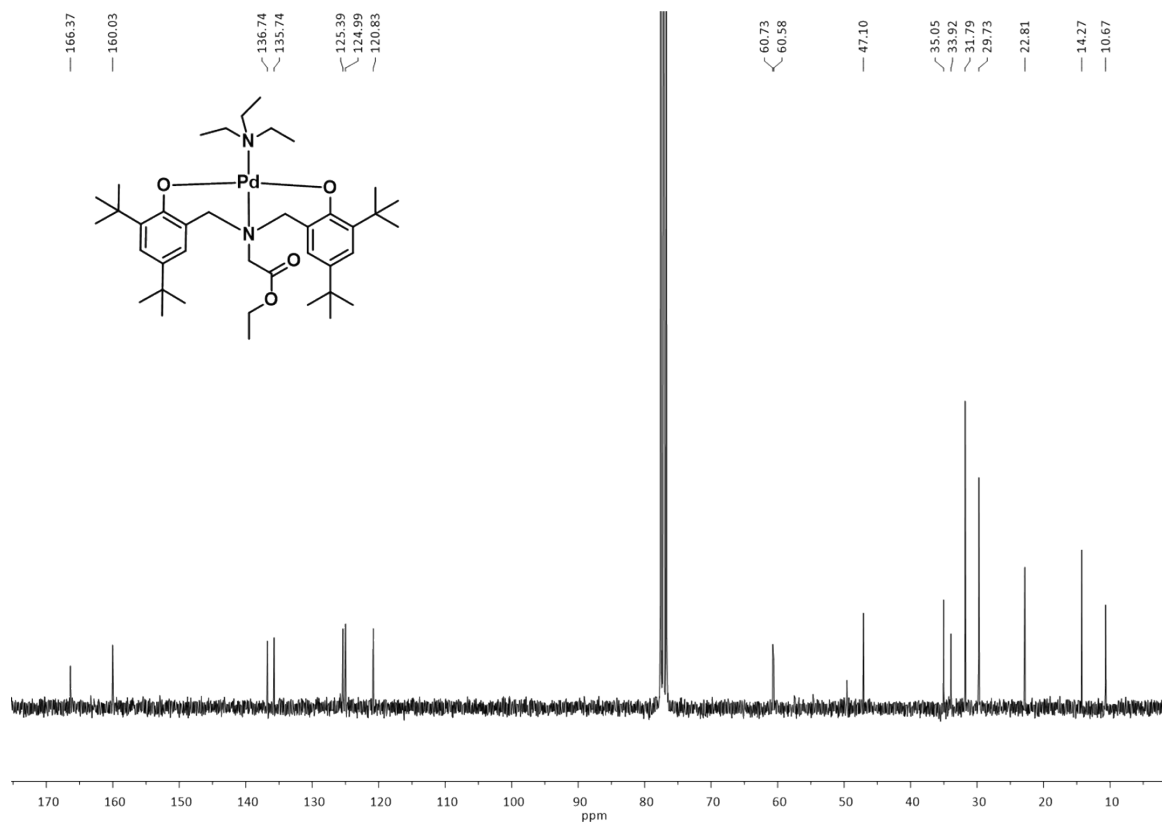

Figure S25.  $^{13}\text{C}$  NMR spectrum of C1 (75 MHz,  $\text{CDCl}_3$  at 298 K).

C2

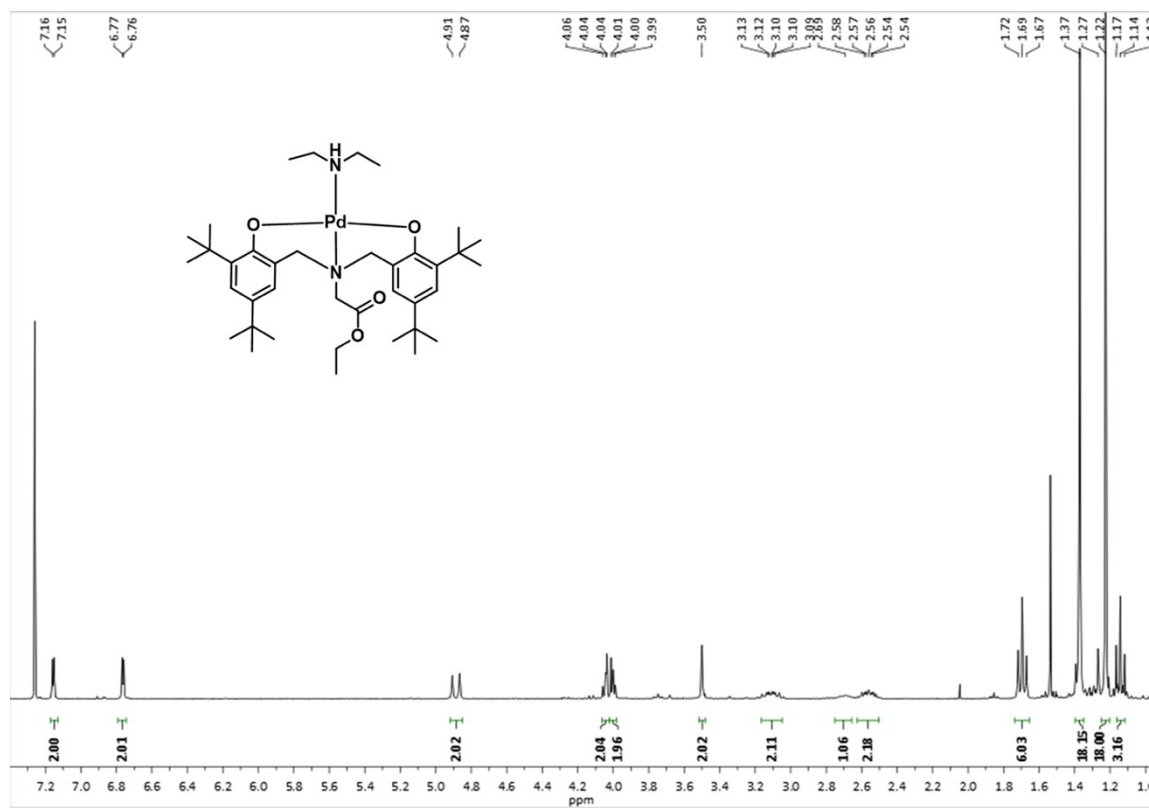

Figure S26.  $^1\text{H}$  NMR spectrum of C2 (300 MHz,  $\text{CDCl}_3$  at 298 K).

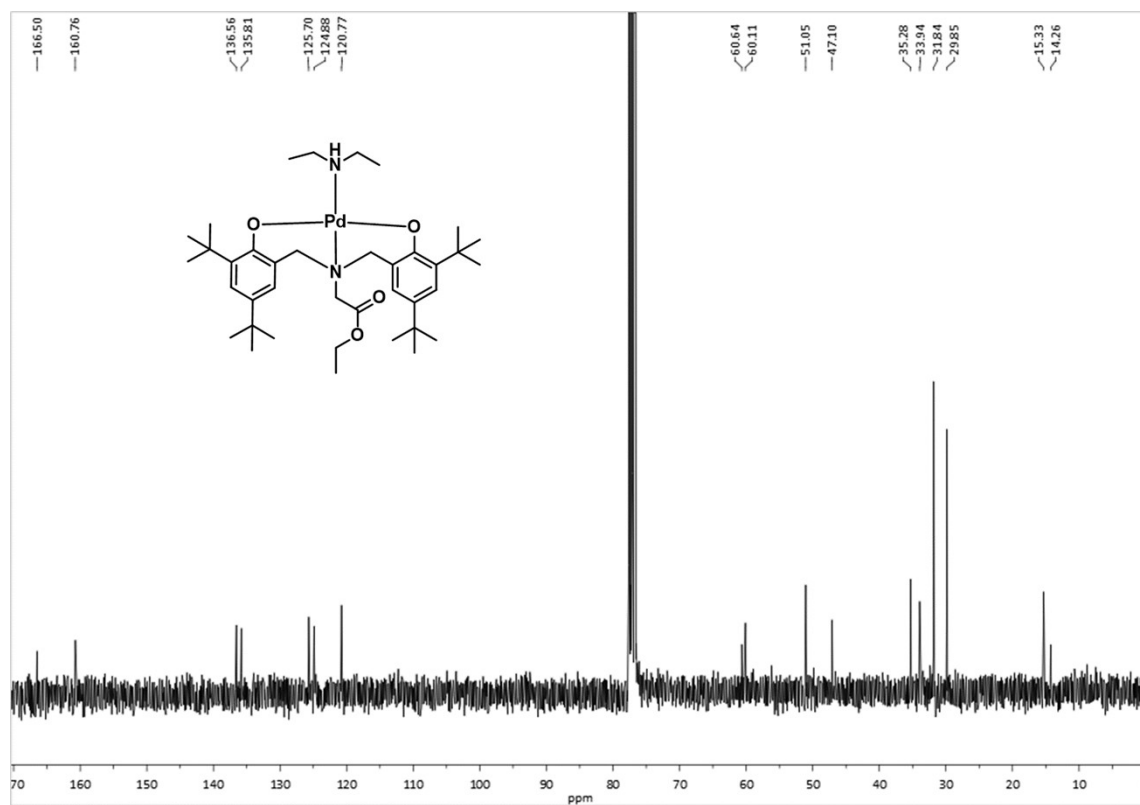

Figure S27.  $^{13}\text{C}$  NMR spectrum of C2 (75 MHz,  $\text{CDCl}_3$  at 298 K).

**C3**

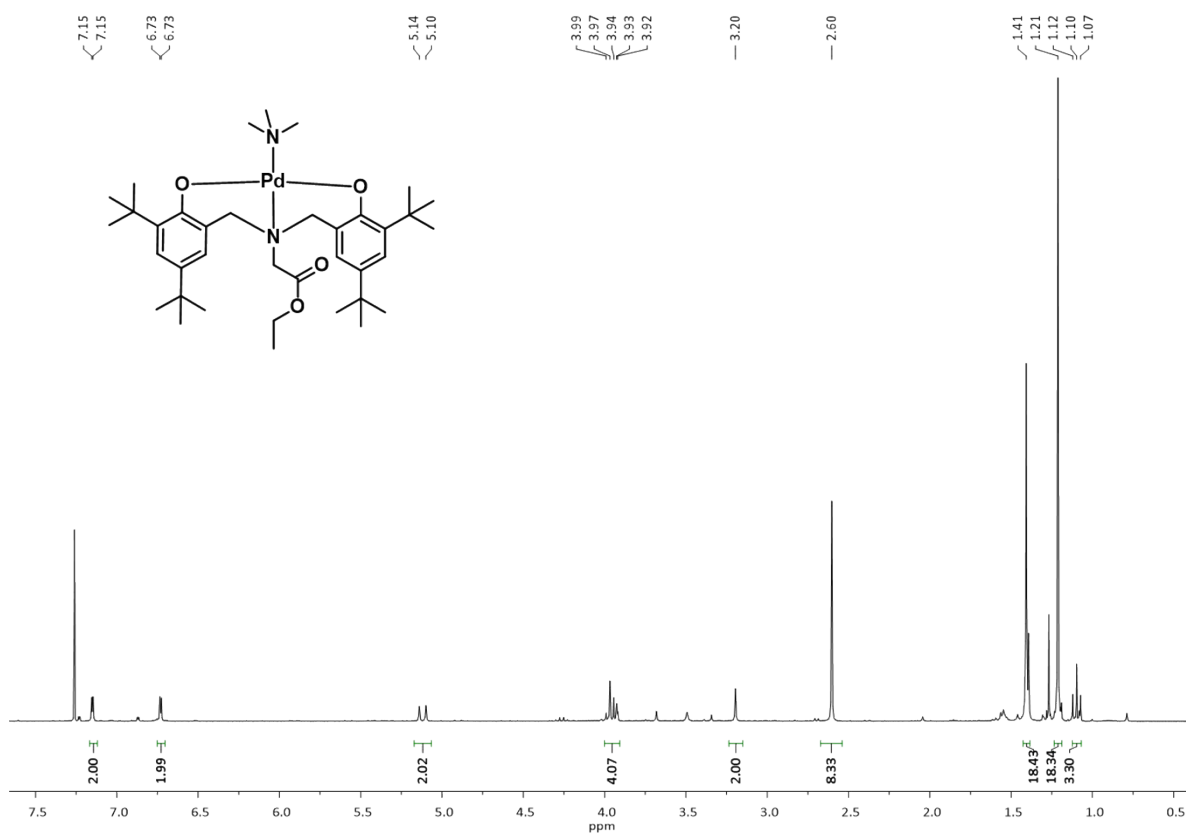

**Figure S28.**  $^1\text{H}$  NMR spectrum of **C3** (300 MHz,  $\text{CDCl}_3$  at 298 K).

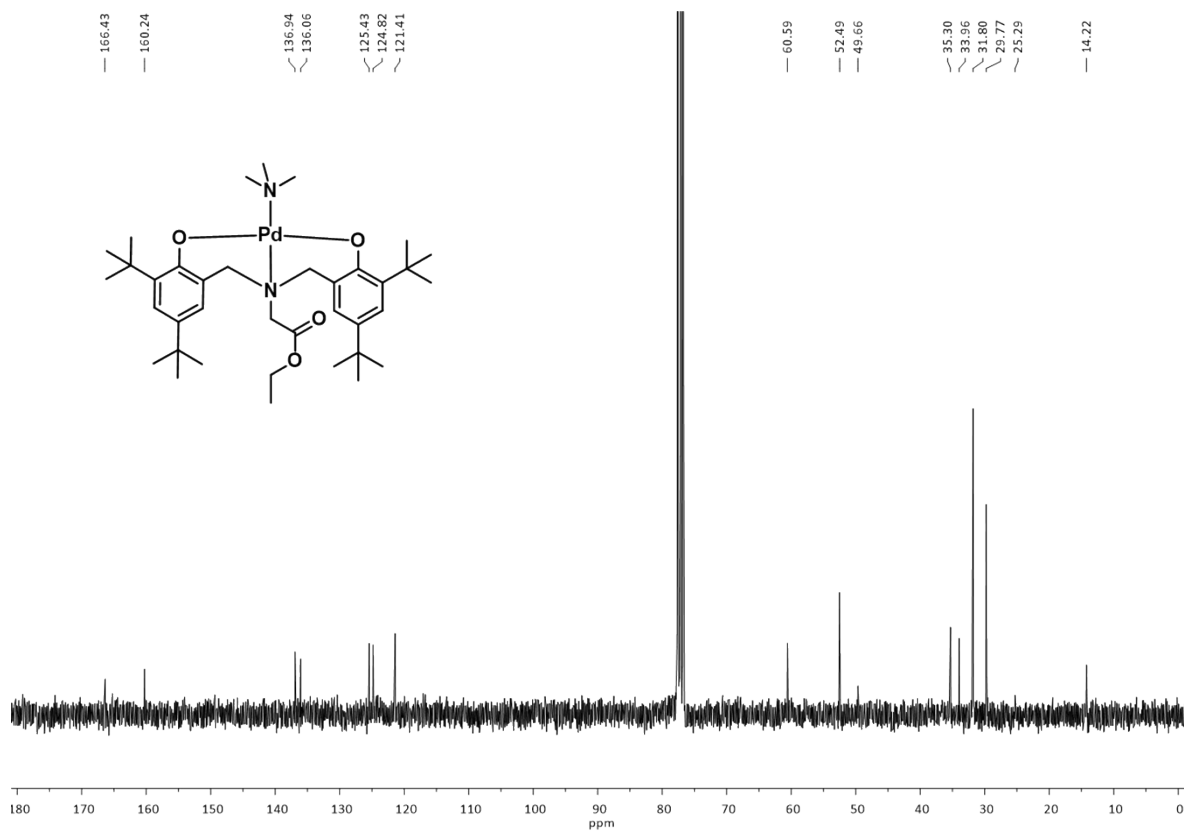

**Figure S29.**  $^{13}\text{C}$  NMR spectrum of **C3** (75 MHz,  $\text{CDCl}_3$  at 298 K).

C4

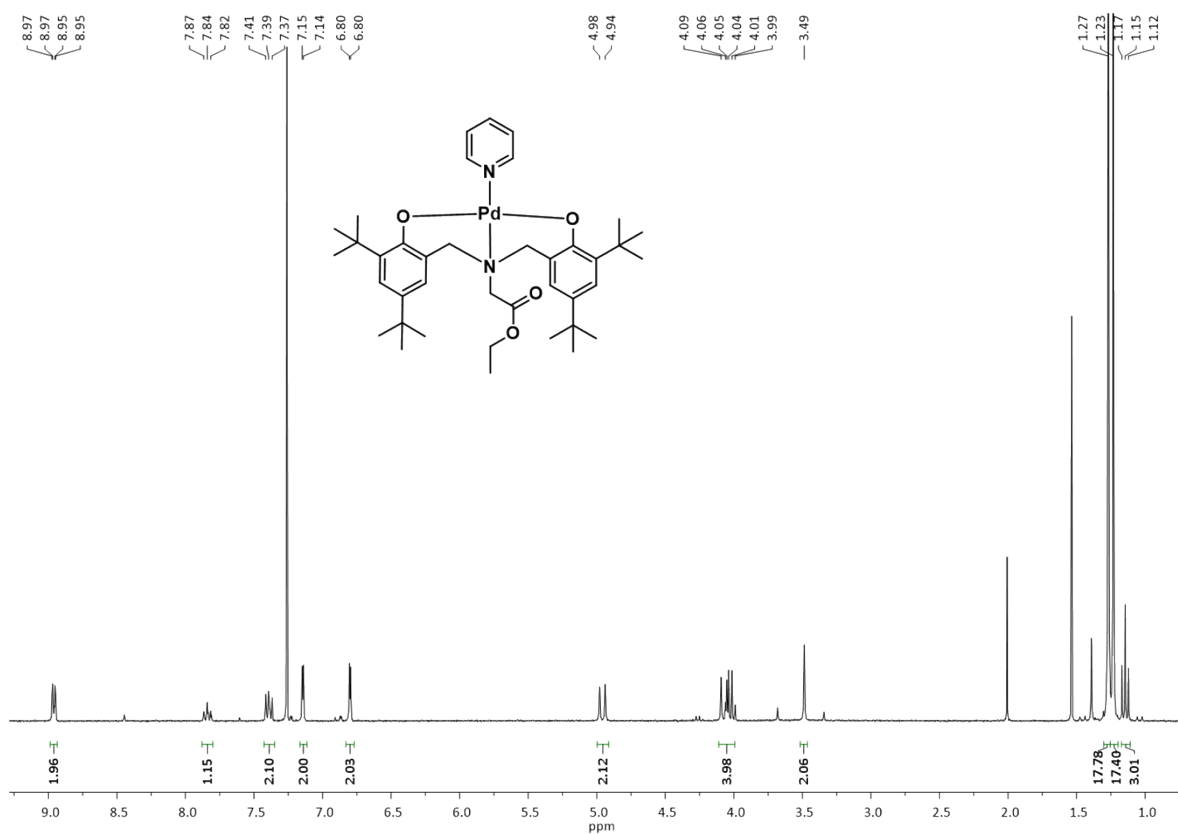

Figure S30. <sup>1</sup>H NMR spectrum of C4 (300 MHz, CDCl<sub>3</sub> at 298 K).

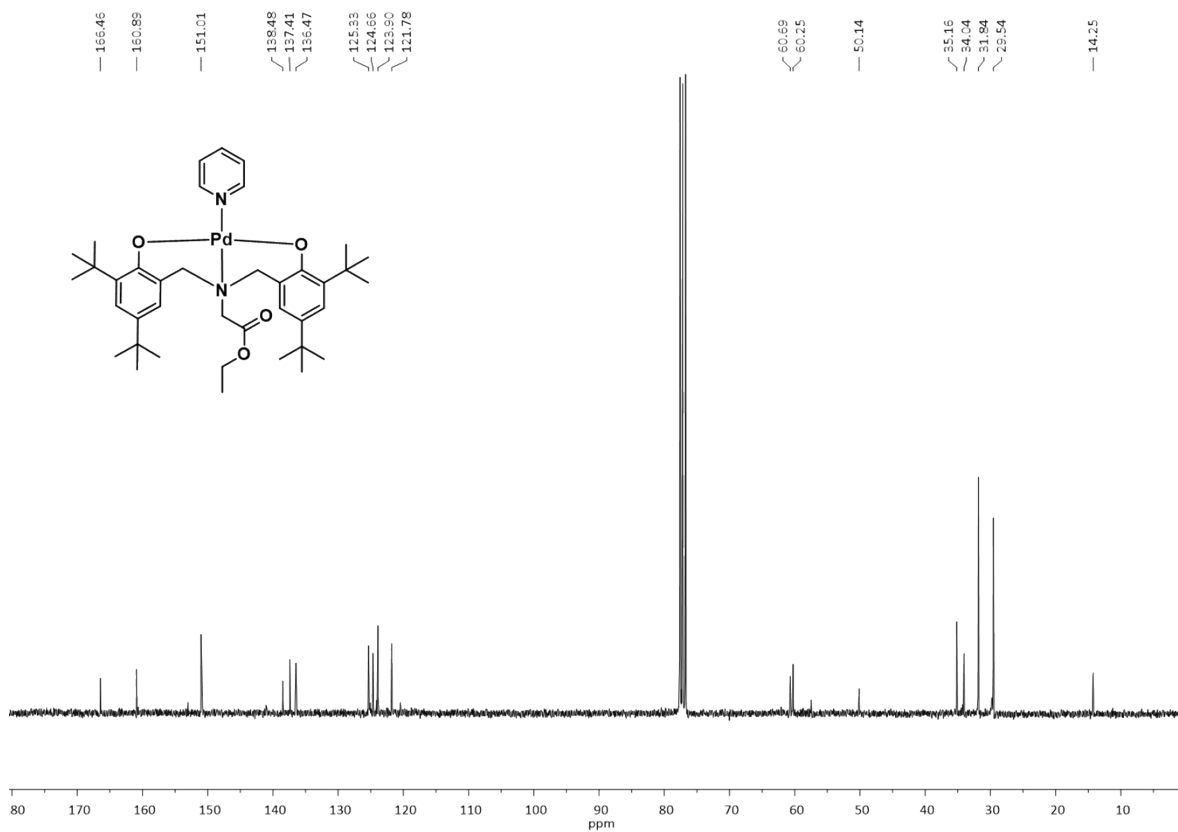

Figure S31. <sup>13</sup>C NMR spectrum of C4 (75 MHz, CDCl<sub>3</sub> at 298 K).

C5

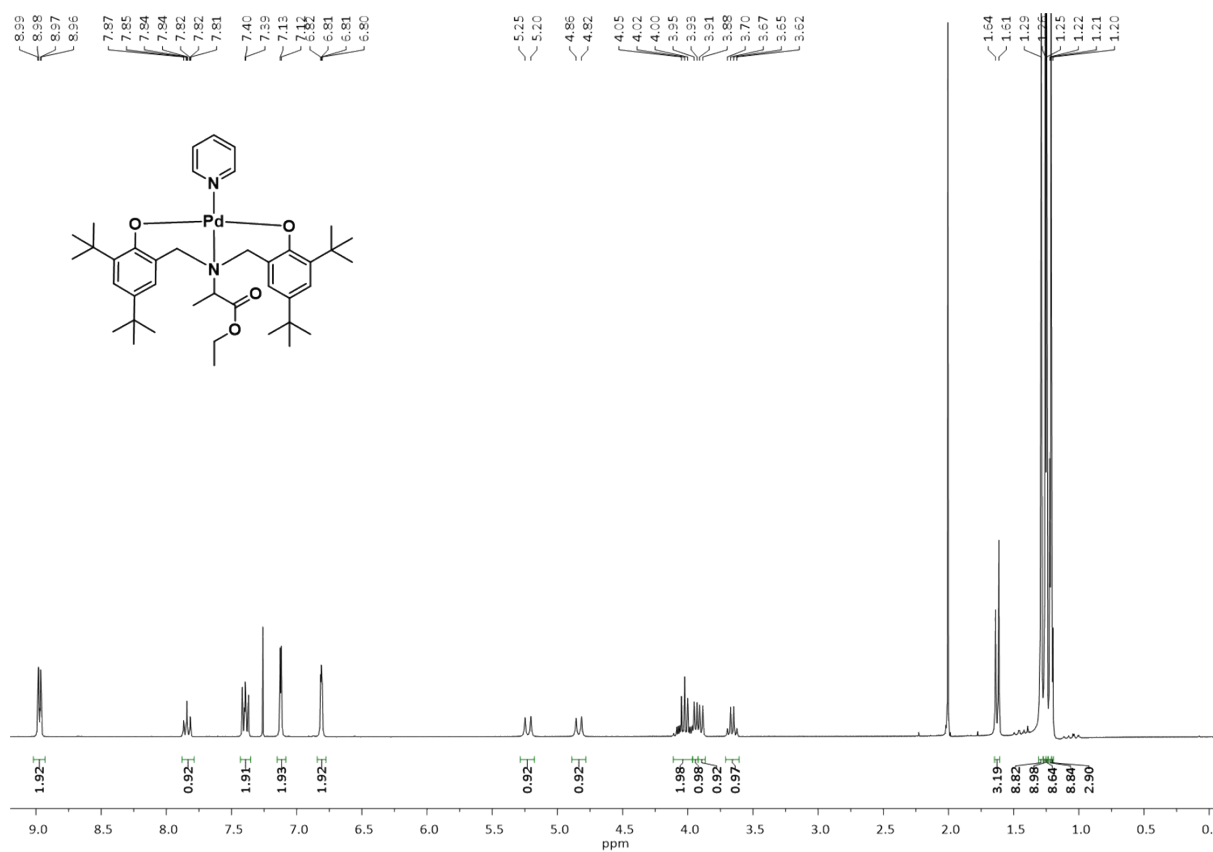

Figure S32. <sup>1</sup>H NMR spectrum of C5 (300 MHz, CDCl<sub>3</sub> at 298 K).

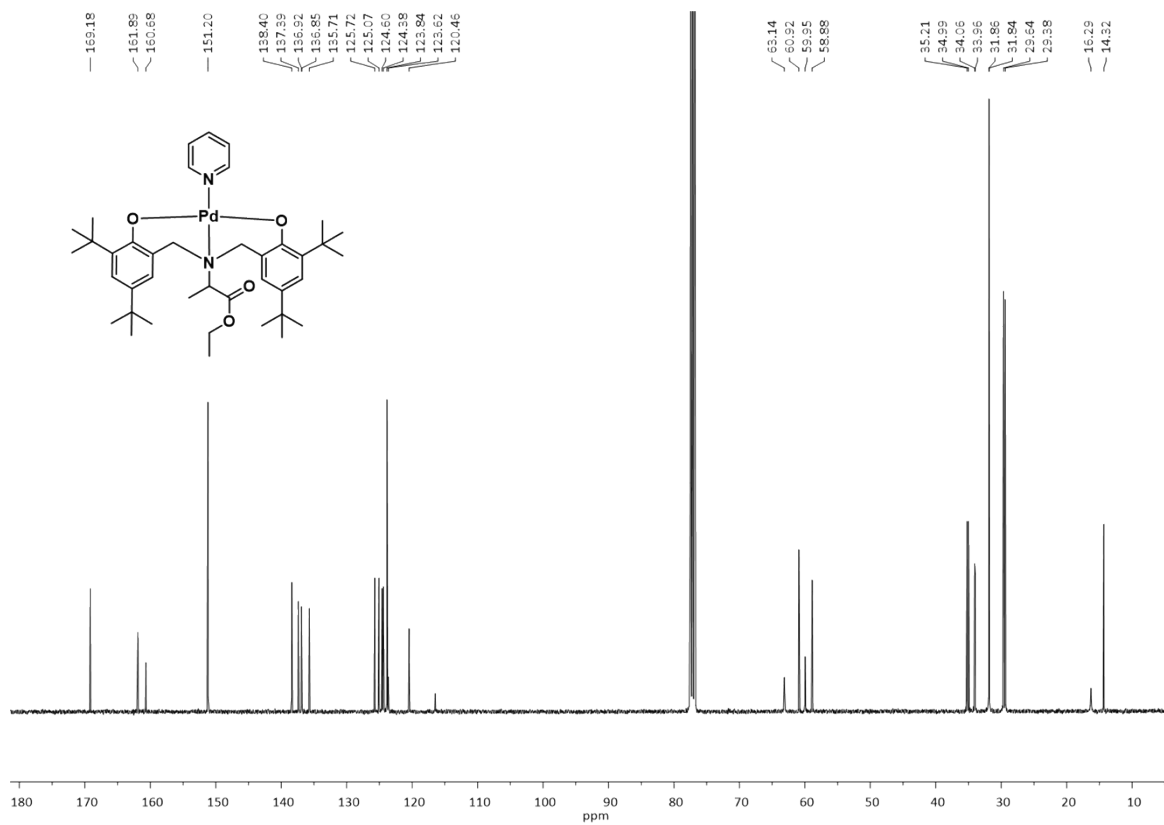

Figure S33. <sup>13</sup>C NMR spectrum of C5 (75 MHz, CDCl<sub>3</sub> at 298 K).





**C7**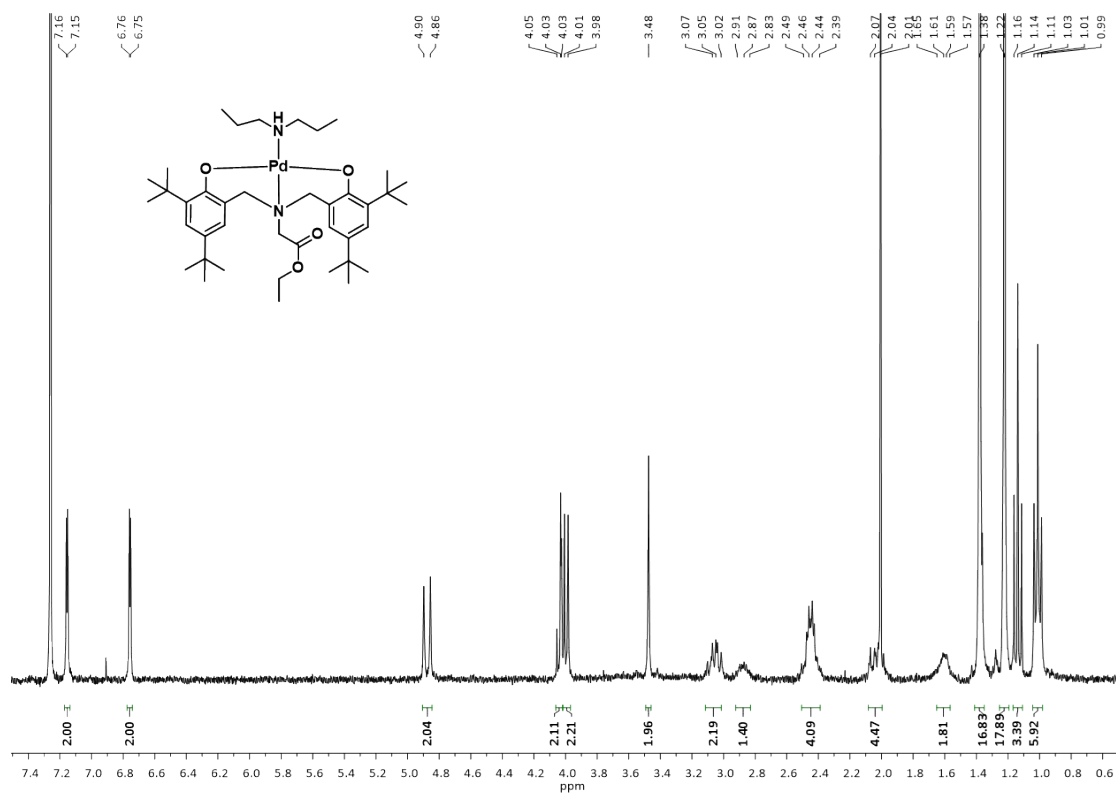

**Figure S36.**  $^1\text{H}$  NMR spectrum of **C7** (300 MHz,  $\text{CDCl}_3$  at 298 K).

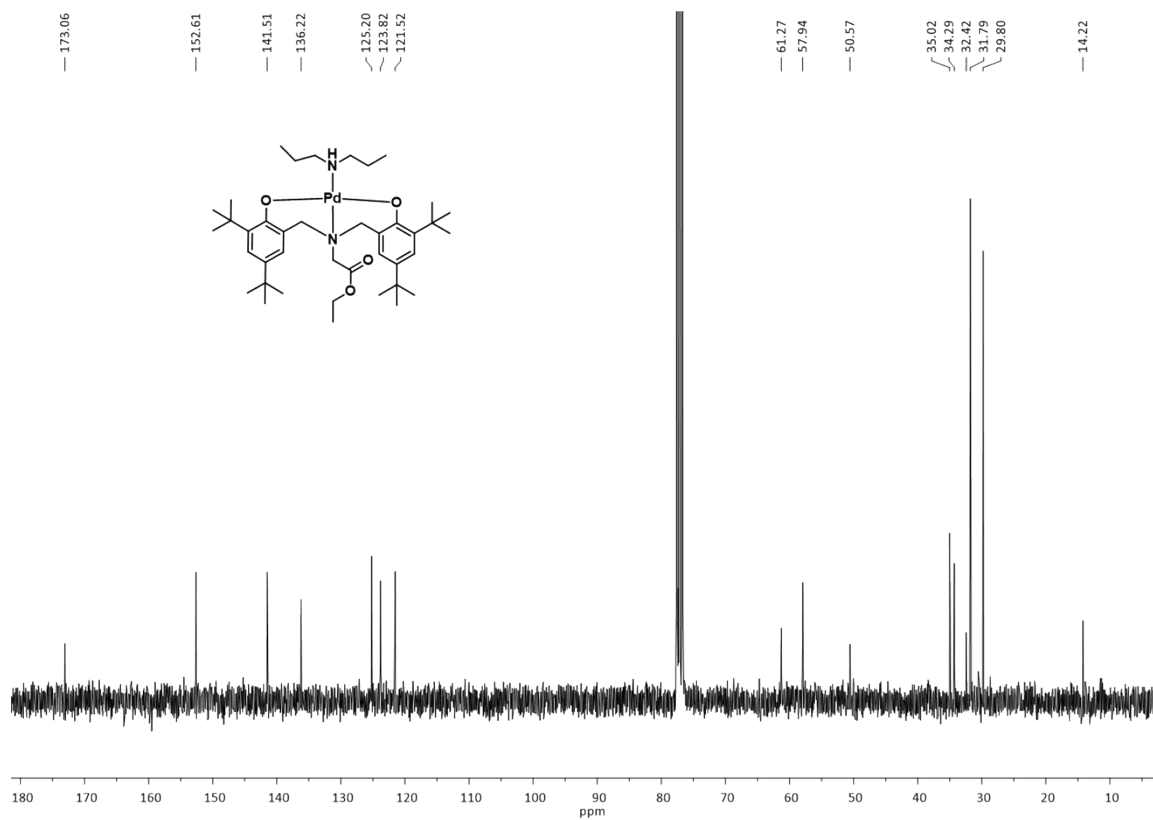

**Figure S37.**  $^{13}\text{C}$  NMR spectrum of **C7** (75 MHz,  $\text{CDCl}_3$  at 298 K).

## 6. ESI High Resolution Mass Spectrometry data of Pd complexes C1-C7

C1

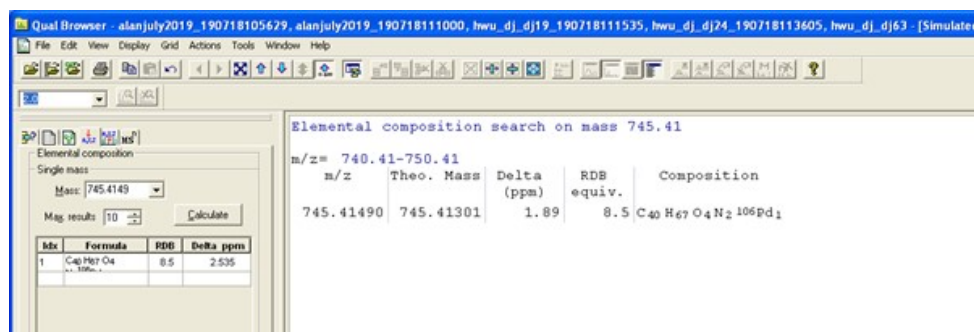

Figure S38. HRMS data of C1.

C2

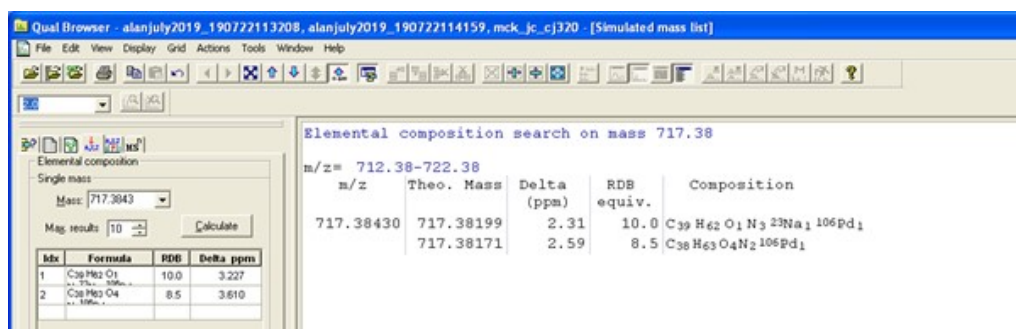

Figure S39. HRMS data of C2.

C3

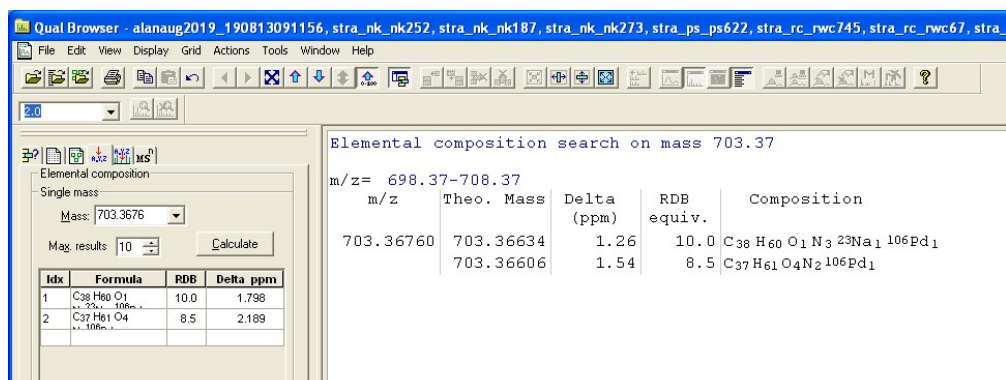

Figure S40. HRMS data of C3.

C4

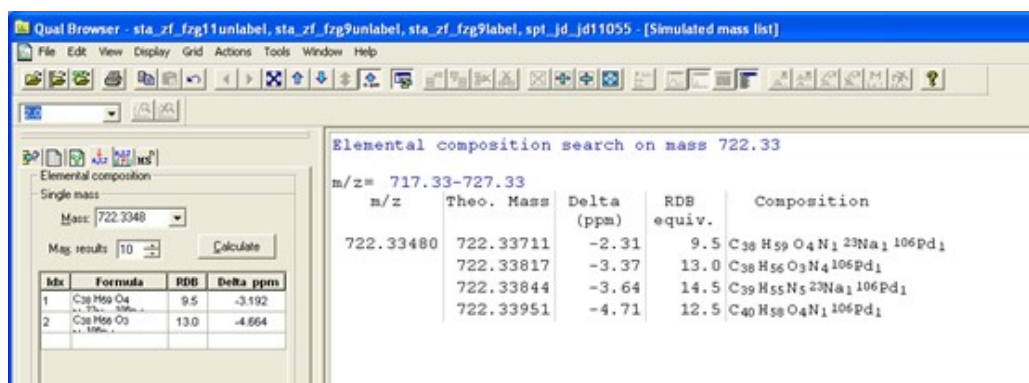

Figure S41. HRMS data of C4.

C5

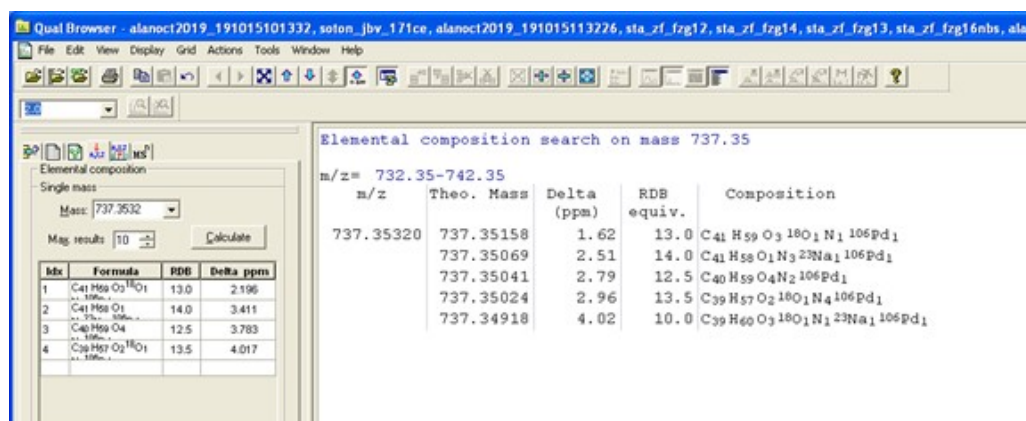

Figure S42. HRMS data of C5.

C6

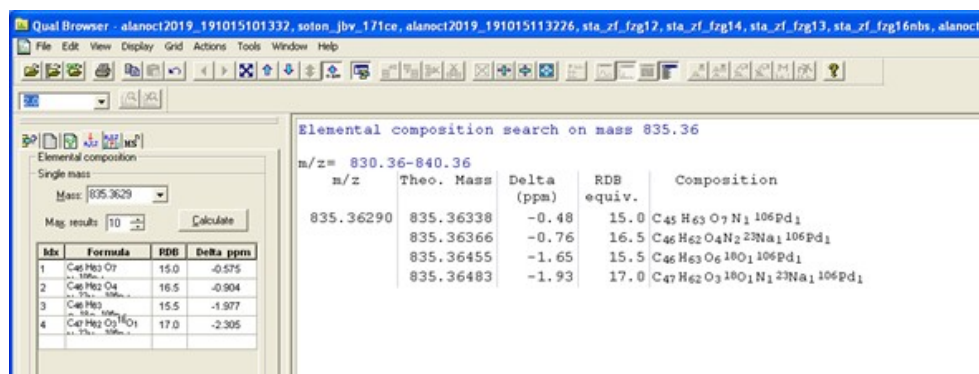

Figure S43. HRMS data of C6.

C7

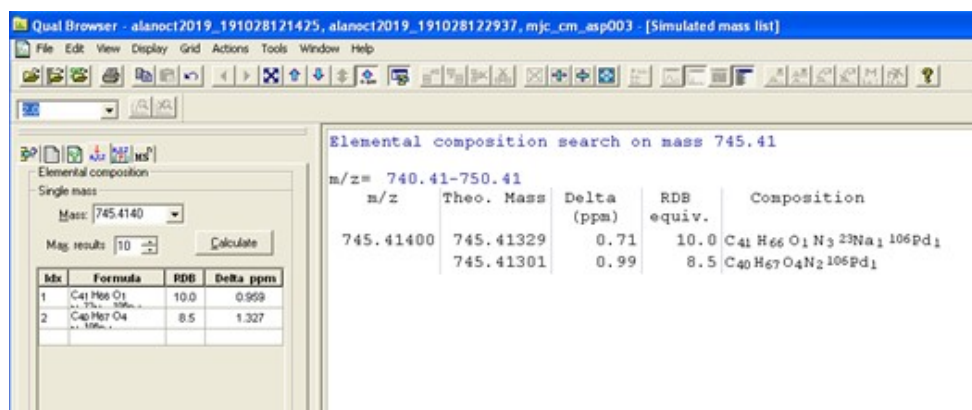

Figure S44. HRMS data of C7.

## 7. Typical $^1\text{H}$ NMR spectra of Suzuki-Miyaura and Mizoroki-Heck crude reaction mixtures

### Suzuki-Miyaura reactions:

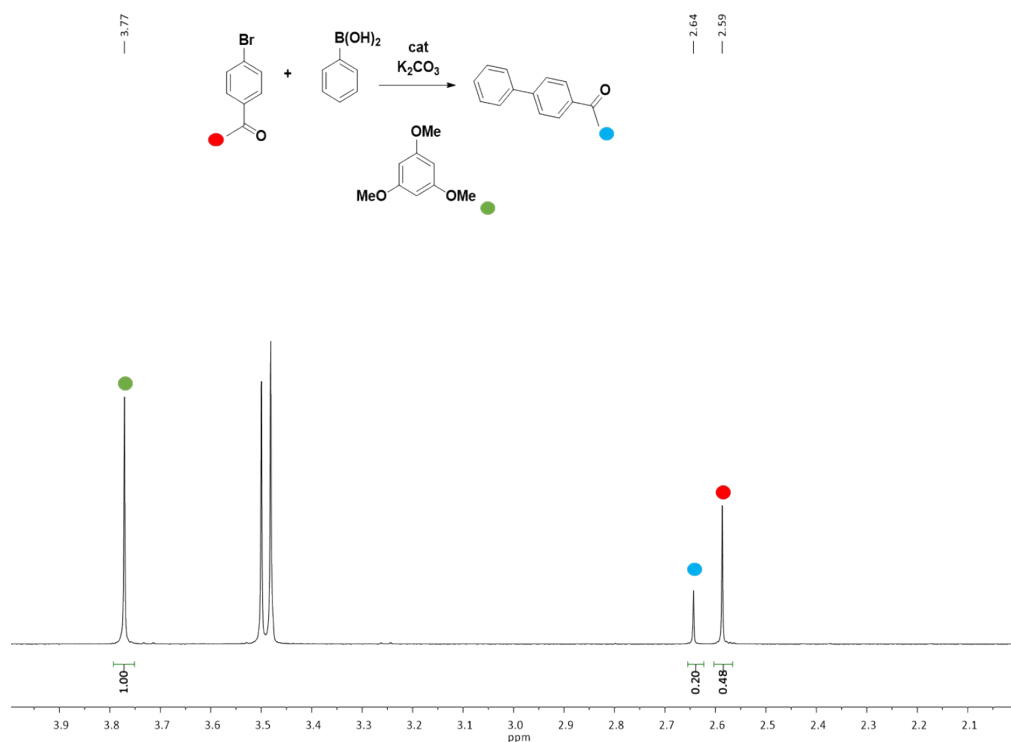

**Figure S45.** Typical  $^1\text{H}$  NMR spectrum (298 K,  $\text{CDCl}_3$ , 300 MHz) of a Suzuki-Miyaura reaction mixture indicating the  $\text{CH}_3$  shifts of starting material (4'-bromoacetophenone, 2.59 ppm, red), product (4-acetylbiphenyl, 2.64 ppm, blue) and internal standard (1,3,5-trimethoxybenzene, 3.77 ppm, green).<sup>1</sup>

### Substrate scope:

All aryl-halides tested in the Suzuki-Miyaura coupling reactions with phenylboronic acid using catalyst **C4** afforded known biaryl species with reported full characterisations. Conversions were calculated *via*  $^1\text{H}$  NMR, integrating the internal standard peak (1,3,5-trimethoxybenzene, 3.77 ppm) against product peaks matched with literature values for bromo-4-nitrobenzene,<sup>2</sup> 4-bromoaniline,<sup>3</sup> 4-bromo-2-fluoronitrobenzene,<sup>4</sup> 1-bromo-2-methoxynaphthalene,<sup>5</sup> 1-bromo-4-*t*Bu-benzene,<sup>6</sup> 1-bromotoluene, 2-bromotoluene and 3-bromotoluene.<sup>7</sup>

### Asymmetric reaction:

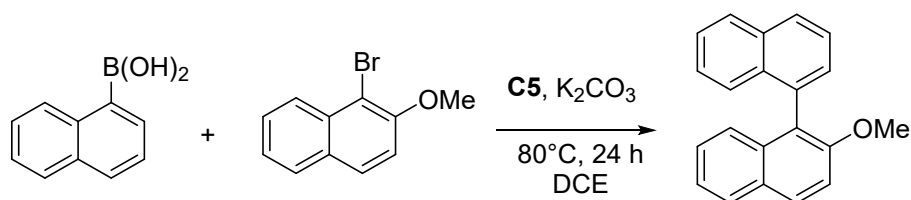

**Scheme S1.** Suzuki-Miyaura coupling of 1-naphthaleneboronic acid and 1-bromo-2-methoxynaphthalene.

**Mizoroki-Heck reactions:**

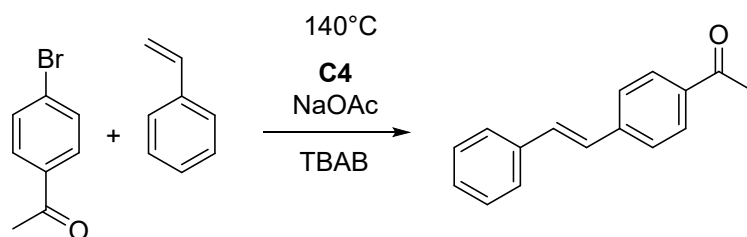

**Scheme S2.** Mizoroki-Heck reaction of 4'-bromoacetophenone and styrene.

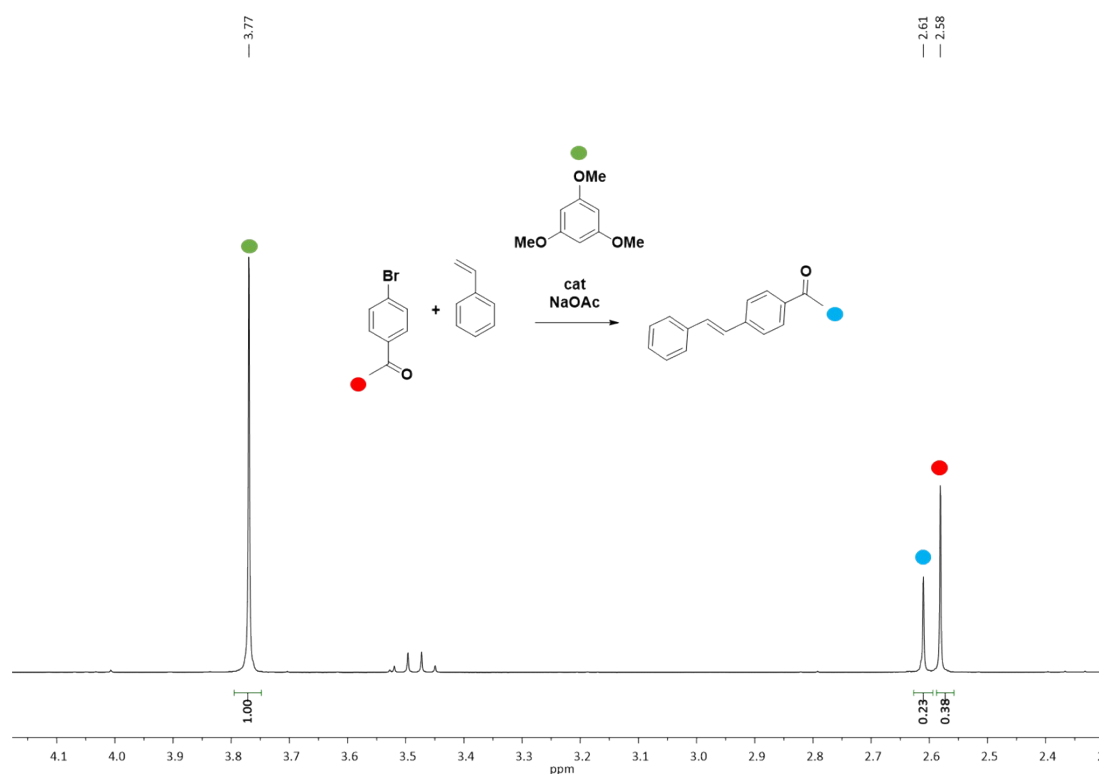

**Figure S46.** Typical  $^1\text{H}$  NMR spectrum (298 K,  $\text{CDCl}_3$ , 300 MHz) of a Heck-Mizoroki reaction mixture indicating the  $\text{CH}_3$  shifts of starting material (4'-bromoacetophenone, 2.59 ppm, red), product (4-acetylstilbene, 2.61 ppm, blue) and internal standard (1,3,5-trimethoxybenzene, 3.77 ppm, green).<sup>8</sup>

**8. Crystallographic data and refinement details for ligands L1-L6 (Table S1) and Complexes C1-C6 (Table S2)**

**Table S1.** Crystallographic data and refinement details for ligands **L1-L6**.

| Identification code                       | <b>L1</b>                                                     | <b>L2</b>                                                     | <b>L3</b>                                                     | <b>L4</b>                                                       | <b>L5</b>                                                     | <b>L6</b>                                                       |
|-------------------------------------------|---------------------------------------------------------------|---------------------------------------------------------------|---------------------------------------------------------------|-----------------------------------------------------------------|---------------------------------------------------------------|-----------------------------------------------------------------|
| CCDC number                               | 2070846                                                       | 2070847                                                       | 2070849                                                       | 2070850                                                         | 2070851                                                       | 2070853                                                         |
| Empirical formula                         | C <sub>34.5</sub> H <sub>54</sub> NO <sub>4</sub> Cl          | C <sub>35</sub> H <sub>55</sub> NO <sub>4</sub>               | C <sub>41</sub> H <sub>59</sub> NO <sub>4</sub>               | C <sub>23</sub> H <sub>31</sub> Cl <sub>2</sub> NO <sub>4</sub> | C <sub>23</sub> H <sub>31</sub> NO <sub>4</sub>               | C <sub>30</sub> H <sub>37</sub> Cl <sub>2</sub> NO <sub>4</sub> |
| Formula weight                            | 582.23                                                        | 553.8                                                         | 629.89                                                        | 456.39                                                          | 385.49                                                        | 546.5                                                           |
| Temperature/K                             | 100                                                           | 100                                                           | 100                                                           | 100                                                             | 100                                                           | 100                                                             |
| Crystal system                            | monoclinic                                                    | orthorhombic                                                  | orthorhombic                                                  | monoclinic                                                      | triclinic                                                     | monoclinic                                                      |
| Space group                               | P2 <sub>1</sub> /c                                            | P2 <sub>1</sub> 2 <sub>1</sub> 2 <sub>1</sub>                 | P2 <sub>1</sub> 2 <sub>1</sub> 2 <sub>1</sub>                 | C2/c                                                            | P-1                                                           | P2 <sub>1</sub> /c                                              |
| a/Å                                       | 14.4965(2)                                                    | 9.08240(10)                                                   | 10.4115(2)                                                    | 22.1011(3)                                                      | 10.5479(2)                                                    | 14.3845(4)                                                      |
| b/Å                                       | 19.9546(3)                                                    | 11.7694(2)                                                    | 11.7529(2)                                                    | 12.1705(2)                                                      | 14.5535(3)                                                    | 16.8171(4)                                                      |
| c/Å                                       | 12.0794(2)                                                    | 31.5208(5)                                                    | 31.8349(5)                                                    | 17.0857(3)                                                      | 15.4442(3)                                                    | 11.7263(3)                                                      |
| α/°                                       | 90                                                            | 90                                                            | 90                                                            | 90                                                              | 70.3610(10)                                                   | 90                                                              |
| β/°                                       | 103.8657(8)                                                   | 90                                                            | 90                                                            | 92.1340(10)                                                     | 70.5070(10)                                                   | 99.9650(10)                                                     |
| γ/°                                       | 90                                                            | 90                                                            | 90                                                            | 90                                                              | 76.5600(10)                                                   | 90                                                              |
| Volume/Å <sup>3</sup>                     | 3392.41(9)                                                    | 3369.40(9)                                                    | 3895.49(12)                                                   | 4592.55(13)                                                     | 2085.52(7)                                                    | 2793.86(13)                                                     |
| Z                                         | 4                                                             | 4                                                             | 4                                                             | 8                                                               | 4                                                             | 4                                                               |
| ρ <sub>calc</sub> /cm <sup>3</sup>        | 1.14                                                          | 1.092                                                         | 1.074                                                         | 1.32                                                            | 1.228                                                         | 1.299                                                           |
| μ/mm <sup>1</sup>                         | 1.269                                                         | 0.543                                                         | 0.525                                                         | 0.312                                                           | 0.667                                                         | 2.375                                                           |
| F(000)                                    | 1268                                                          | 1216                                                          | 1376                                                          | 1936                                                            | 832                                                           | 1160                                                            |
| Crystal size/mm <sup>3</sup>              | 0.28 × 0.22 × 0.06                                            | 0.4 × 0.36 × 0.12                                             | 0.25 × 0.18 × 0.14                                            | 0.3 × 0.2 × 0.2                                                 | 0.32 × 0.2 × 0.16                                             | 0.32 × 0.04 × 0.04                                              |
| Radiation                                 | CuKα (λ = 1.54178)                                            | CuKα (λ = 1.54178)                                            | CuKα (λ = 1.54178)                                            | MoKα (λ = 0.71073)                                              | CuKα (λ = 1.54184)                                            | CuKα (λ = 1.54178)                                              |
| 2θ range for data coll./°                 | 6.28 to 140.358                                               | 5.608 to 144.242                                              | 8.018 to 136.742                                              | 5.922 to 54.202                                                 | 6.328 to 145.126                                              | 6.238 to 153.202                                                |
| Index ranges                              | -17 ≤ h ≤ 16, -24 ≤ k ≤ 24, -14 ≤ l ≤ 14                      | -11 ≤ h ≤ 11, -14 ≤ k ≤ 14, -38 ≤ l ≤ 38                      | -12 ≤ h ≤ 12, -14 ≤ k ≤ 14, -36 ≤ l ≤ 38                      | -27 ≤ h ≤ 28, -15 ≤ k ≤ 15, -21 ≤ l ≤ 21                        | -13 ≤ h ≤ 13, -17 ≤ k ≤ 16, -19 ≤ l ≤ 18                      | -17 ≤ h ≤ 17, -20 ≤ k ≤ 20, -14 ≤ l ≤ 14                        |
| Reflections collected                     | 46320                                                         | 47117                                                         | 48693                                                         | 42089                                                           | 24899                                                         | 33650                                                           |
| Independent reflections                   | 6446 [R <sub>int</sub> = 0.0405, R <sub>sigma</sub> = 0.0216] | 6637 [R <sub>int</sub> = 0.0279, R <sub>sigma</sub> = 0.0151] | 7128 [R <sub>int</sub> = 0.0419, R <sub>sigma</sub> = 0.0219] | 5056 [R <sub>int</sub> = 0.0306, R <sub>sigma</sub> = 0.0158]   | 8049 [R <sub>int</sub> = 0.0550, R <sub>sigma</sub> = 0.0542] | 5696 [R <sub>int</sub> = 0.0739, R <sub>sigma</sub> = 0.0472]   |
| Data/restraints/parameters                | 6446/0/448                                                    | 6637/0/377                                                    | 7128/1/441                                                    | 5056/12/311                                                     | 8049/0/521                                                    | 5696/0/341                                                      |
| Goodness-of-fit on F <sup>2</sup>         | 1.052                                                         | 1.036                                                         | 1.087                                                         | 1.045                                                           | 1.078                                                         | 1.046                                                           |
| Final R indexes [I ≥ 2σ (I)]              | R <sub>1</sub> = 0.0415, wR <sub>2</sub> = 0.1016             | R <sub>1</sub> = 0.0262, wR <sub>2</sub> = 0.0693             | R <sub>1</sub> = 0.0567, wR <sub>2</sub> = 0.1615             | R <sub>1</sub> = 0.0417, wR <sub>2</sub> = 0.1168               | R <sub>1</sub> = 0.0494, wR <sub>2</sub> = 0.1295             | R <sub>1</sub> = 0.0631, wR <sub>2</sub> = 0.1566               |
| Final R indexes [all data]                | R <sub>1</sub> = 0.0477, wR <sub>2</sub> = 0.1065             | R <sub>1</sub> = 0.0265, wR <sub>2</sub> = 0.0696             | R <sub>1</sub> = 0.0583, wR <sub>2</sub> = 0.1632             | R <sub>1</sub> = 0.0493, wR <sub>2</sub> = 0.1237               | R <sub>1</sub> = 0.0716, wR <sub>2</sub> = 0.1405             | R <sub>1</sub> = 0.0814, wR <sub>2</sub> = 0.1719               |
| Largest diff. peak/hole/e Å <sup>-3</sup> | 0.30/-0.25                                                    | 0.27/-0.16                                                    | 1.34/-0.21                                                    | 0.38/-0.59                                                      | 0.22/-0.25                                                    | 0.37/-0.82                                                      |



**Table S2.** Crystallographic data and refinement details for complexes **C1-C6**.

| Identification code                       | <b>C1</b>                                                        | <b>C2</b>                                                          | <b>C3</b>                                                              | <b>C4</b>                                                        | <b>C5</b>                                                        | <b>C6</b>                                                        |
|-------------------------------------------|------------------------------------------------------------------|--------------------------------------------------------------------|------------------------------------------------------------------------|------------------------------------------------------------------|------------------------------------------------------------------|------------------------------------------------------------------|
| CCDC number                               | 2063653                                                          | 2063654                                                            | 2060147                                                                | 2060195                                                          | 2060200                                                          | 2060206                                                          |
| Empirical formula                         | C <sub>40</sub> H <sub>66</sub> N <sub>2</sub> O <sub>4</sub> Pd | C <sub>41</sub> H <sub>69.5</sub> N <sub>2</sub> O <sub>4</sub> Pd | C <sub>36.66</sub> H <sub>59.32</sub> N <sub>2</sub> O <sub>4</sub> Pd | C <sub>39</sub> H <sub>56</sub> N <sub>2</sub> O <sub>4</sub> Pd | C <sub>42</sub> H <sub>61</sub> N <sub>3</sub> O <sub>4</sub> Pd | C <sub>46</sub> H <sub>62</sub> N <sub>2</sub> O <sub>4</sub> Pd |
| Formula weight                            | 745.34                                                           | 760.88                                                             | 698.5                                                                  | 723.25                                                           | 778.33                                                           | 813.37                                                           |
| Temperature/K                             | 100                                                              | 100                                                                | 100                                                                    | 100                                                              | 100                                                              | 100                                                              |
| Crystal system                            | monoclinic                                                       | monoclinic                                                         | triclinic                                                              | monoclinic                                                       | orthorhombic                                                     | monoclinic                                                       |
| Space group                               | Pn                                                               | C2/c                                                               | P-1                                                                    | P2 <sub>1</sub> /c                                               | Pna2 <sub>1</sub>                                                | P2 <sub>1</sub>                                                  |
| a/Å                                       | 9.9356(4)                                                        | 27.3384(7)                                                         | 10.8890(2)                                                             | 23.5009(5)                                                       | 18.1718(8)                                                       | 13.3749(3)                                                       |
| b/Å                                       | 26.4605(11)                                                      | 9.7533(2)                                                          | 11.7145(3)                                                             | 5.88070(10)                                                      | 11.3807(4)                                                       | 10.4918(2)                                                       |
| c/Å                                       | 15.5658(6)                                                       | 31.2674(8)                                                         | 15.3877(3)                                                             | 28.0066(6)                                                       | 20.0056(7)                                                       | 16.3394(3)                                                       |
| α/°                                       | 90                                                               | 90                                                                 | 103.1830(10)                                                           | 90                                                               | 90                                                               | 90                                                               |
| β/°                                       | 105.0420(10)                                                     | 96.1430(10)                                                        | 104.3440(10)                                                           | 106.1280(10)                                                     | 90                                                               | 112.5780(10)                                                     |
| γ/°                                       | 90                                                               | 90                                                                 | 99.5060(10)                                                            | 90                                                               | 90                                                               | 90                                                               |
| Volume/Å <sup>3</sup>                     | 3952.0(3)                                                        | 8289.3(3)                                                          | 1799.70(7)                                                             | 3718.23(13)                                                      | 4137.3(3)                                                        | 2117.13(7)                                                       |
| Z                                         | 4                                                                | 8                                                                  | 2                                                                      | 4                                                                | 4                                                                | 2                                                                |
| ρ <sub>calc</sub> /cm <sup>3</sup>        | 1.253                                                            | 1.219                                                              | 1.289                                                                  | 1.292                                                            | 1.25                                                             | 1.276                                                            |
| μ/mm <sup>1</sup>                         | 0.509                                                            | 3.908                                                              | 4.456                                                                  | 4.336                                                            | 3.94                                                             | 3.867                                                            |
| F(000)                                    | 1592                                                             | 3260                                                               | 743                                                                    | 1528                                                             | 1648                                                             | 860                                                              |
| Crystal size/mm <sup>3</sup>              | 0.3 × 0.2 × 0.2                                                  | 0.22 × 0.08 × 0.04                                                 | 0.18 × 0.06 × 0.04                                                     | 0.38 × 0.04 × 0.04                                               | 0.38 × 0.10 × 0.06                                               | 0.1 × 0.03 × 0.03                                                |
| Radiation                                 | MoKα (λ = 0.71073)                                               | CuKα (λ = 1.54178)                                                 | CuKα (λ = 1.54178)                                                     | CuKα (λ = 1.54178)                                               | CuKα (λ = 1.54178)                                               | CuKα (λ = 1.54178)                                               |
| 2θ range for data coll./°                 | 5.354 to 52.802                                                  | 5.686 to 119.832                                                   | 6.178 to 149.518                                                       | 6.57 to 149.684                                                  | 10.18 to 150.324                                                 | 10.86 to 149.778                                                 |
| Index ranges                              | -12 ≤ h ≤ 12, -33 ≤ k ≤ 33, -19 ≤ l ≤ 19                         | -29 ≤ h ≤ 30, -10 ≤ k ≤ 10, -33 ≤ l ≤ 34                           | -13 ≤ h ≤ 13, -13 ≤ k ≤ 14, -19 ≤ l ≤ 19                               | -29 ≤ h ≤ 29, -7 ≤ k ≤ 7, -34 ≤ l ≤ 35                           | -22 ≤ h ≤ 22, -14 ≤ k ≤ 14, -25 ≤ l ≤ 25                         | -16 ≤ h ≤ 15, -13 ≤ k ≤ 13, -20 ≤ l ≤ 20                         |
| Reflections collected                     | 146440                                                           | 44289                                                              | 141515                                                                 | 81773                                                            | 55090                                                            | 56149                                                            |
| Independent reflections                   | 15877 [R <sub>int</sub> = 0.0551, R <sub>sigma</sub> = 0.0239]   | 6054 [R <sub>int</sub> = 0.0382, R <sub>sigma</sub> = 0.0249]      | 7359 [R <sub>int</sub> = 0.0707, R <sub>sigma</sub> = 0.0224]          | 7626 [R <sub>int</sub> = 0.0323, R <sub>sigma</sub> = 0.0167]    | 8373 [R <sub>int</sub> = 0.0409, R <sub>sigma</sub> = 0.0277]    | 8347 [R <sub>int</sub> = 0.0358, R <sub>sigma</sub> = 0.0312]    |
| Data/restraints/parameters                | 15877/7/905                                                      | 6054/1/462                                                         | 7359/0/414                                                             | 7626/0/428                                                       | 8373/7/498                                                       | 8347/1/492                                                       |
| Goodness-of-fit on F <sup>2</sup>         | 1.057                                                            | 1.039                                                              | 1.058                                                                  | 1.05                                                             | 1.054                                                            | 1.035                                                            |
| Final R indexes [I>=2σ (I)]               | R <sub>1</sub> = 0.0293, wR <sub>2</sub> = 0.0646                | R <sub>1</sub> = 0.0271, wR <sub>2</sub> = 0.0639                  | R <sub>1</sub> = 0.0429, wR <sub>2</sub> = 0.0870                      | R <sub>1</sub> = 0.0217, wR <sub>2</sub> = 0.0567                | R <sub>1</sub> = 0.0199, wR <sub>2</sub> = 0.0515                | R <sub>1</sub> = 0.0179, wR <sub>2</sub> = 0.0444                |
| Final R indexes [all data]                | R <sub>1</sub> = 0.0314, wR <sub>2</sub> = 0.0656                | R <sub>1</sub> = 0.0316, wR <sub>2</sub> = 0.0664                  | R <sub>1</sub> = 0.0483, wR <sub>2</sub> = 0.0900                      | R <sub>1</sub> = 0.0229, wR <sub>2</sub> = 0.0576                | R <sub>1</sub> = 0.0201, wR <sub>2</sub> = 0.0516                | R <sub>1</sub> = 0.0180, wR <sub>2</sub> = 0.0444                |
| Largest diff. peak/hole/e Å <sup>-3</sup> | 0.56/-0.47                                                       | 0.43/-0.56                                                         | 1.25/-1.37                                                             | 0.39/-0.72                                                       | 0.37/-0.99                                                       | 0.35/-0.49                                                       |

## **10. References**

1. A. K. Bowser, A. M. Anderson-Wile, D. H. Johnston and B. M. Wile, *Appl. Organomet. Chem.*, 2016, **30**, 32-39.
2. S.-D. Cho, H.-K. Kim, H.-s. Yim, M.-R. Kim, J.-K. Lee, J.-J. Kim and Y.-J. Yoon, *Tetrahedron*, 2007, **63**, 1345-1352.
3. E. Alacid and C. Nájera, *Org. Lett.*, 2008, **10**, 5011-5014.
4. D.-D. Li, W.-L. Chen, X.-L. Xu, F. Jiang, L. Wang, Y.-Y. Xie, X.-J. Zhang, X.-K. Guo, Q.-D. You and H.-P. Sun, *Eur. J. Med. Chem.*, 2016, **118**, 1-8.
5. H. Li, Y. Wu and W. Yan, *J. Organomet. Chem.*, 2006, **691**, 5688-5696.
6. H. Li, C.-L. Sun, M. Yu, D.-G. Yu, B.-J. Li and Z.-J. Shi, *Chem. Eur. J.*, 2011, **17**, 3593-3597.
7. D. Zhang, L. Le, R. Qiu, W.-Y. Wong and N. Kambe, *Angew. Chem. Int. Ed.*, 2021, **60**, 3104-3114.
8. L.-C. Liu, Y.-H. Tzeng, C.-H. Hung and H. M. Lee, *Eur. J. Inorg. Chem.*, 2020, 3601-3611.
